# Supplementary material for: Enzyme immobilisation in biocatalysis: why, what and how
Source: Royal Society of Chemistry journal article supplement (doi:10.1039/c3cs60075k), 2013-03-27

# Enzyme Immobilization: Why, What and How

Roger A. Sheldon

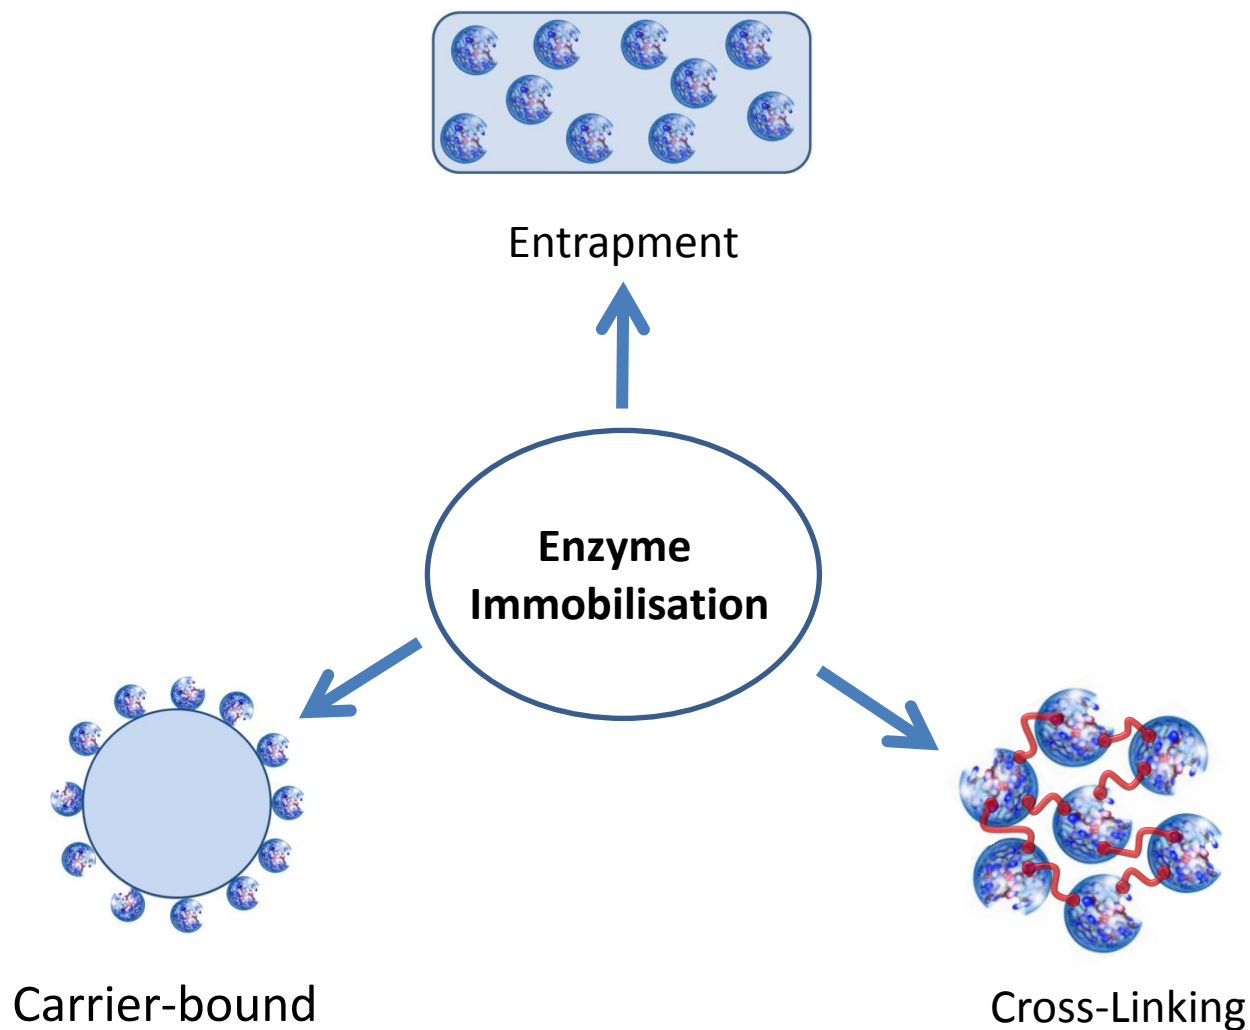

# Why use enzymes?

- Renewable, biodegradable feedstock
- Mild conditions (pH, T & P)
- High rates
- Higher quality product
- High chemo, regio & enantioselectivity
- No special equipment needed
- Environmentally & economically attractive (GREEN)

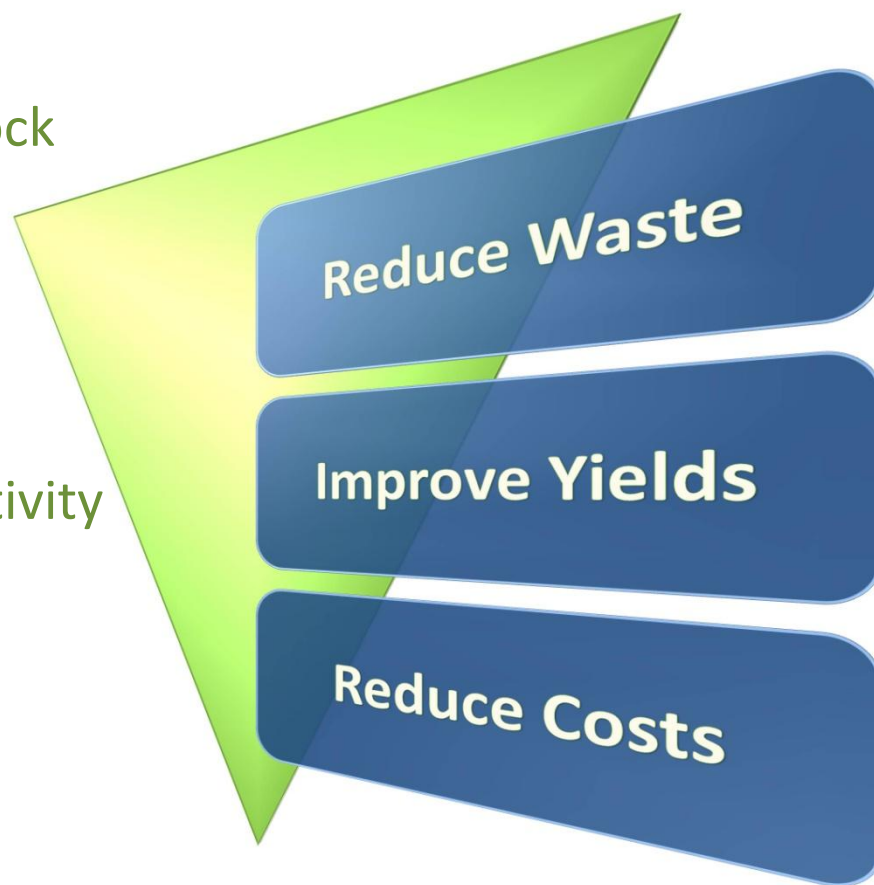

# The Challenge

- Disadvantages of enzymes
  - Low operational stability & shelf life
  - Cumbersome recovery & re-use
  - Product contamination
  - Allergic reactions to proteins
- Non viable biocatalytic applications
  - Enzyme costs too high
  - Not practical

# The Solution: Immobilization

- Immobilization is Enabling Technology

**High waste / low profit**

**Low waste / high profit**

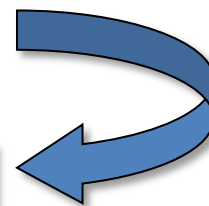

- **Advantages**
  - stability, stability, stability ...
  - repeated re-use of biocatalyst (batch)
  - easier downstream processing
  - continuous process technology

# Types of Immobilization

- Binding to a carrier
  - e.g. ion exchange resins

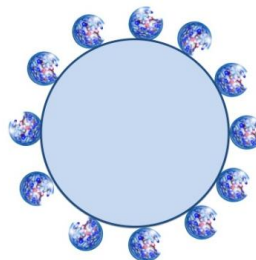

- Entrapment
  - e.g. in silica sol-gel

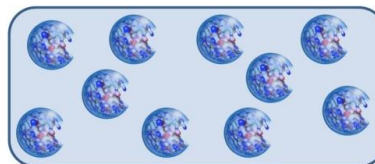

- Cross-Linking
  - e.g. Cross-Linked Enzyme Aggregate (CLEA)

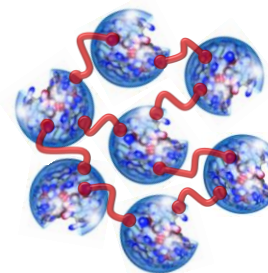

Carrier-bound / entrapped enzymes have inherently low volumetric & catalyst productivities (90->99% non-catalytic mass)

R.A. Sheldon, *Adv. Synth. Catal.*, 349 (2007) 1289

# Cross-Linking with Glutaraldehyde

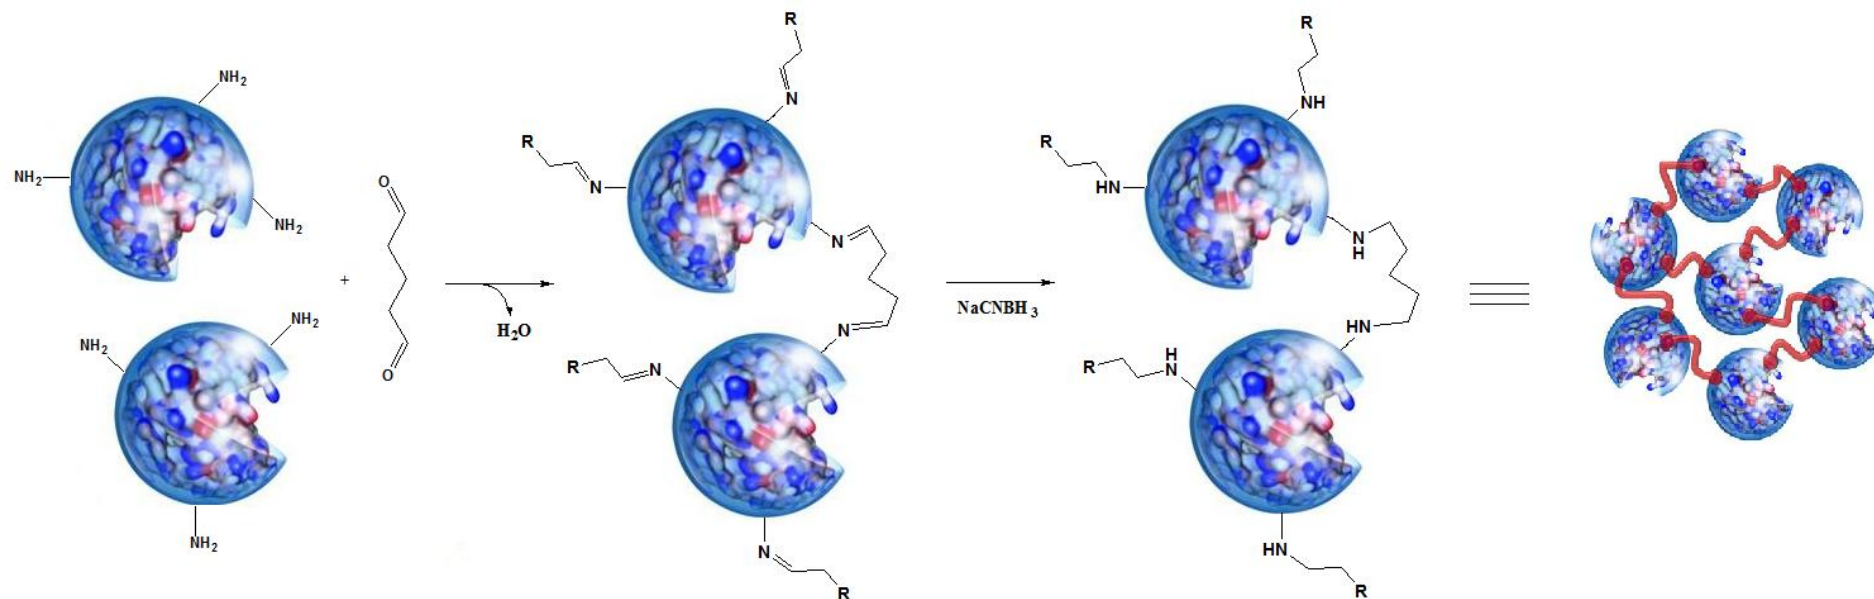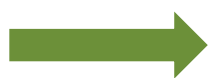

The monomeric structure of glutaraldehyde does not reflect the complexity of glutaraldehyde behavior in solution and its reactivity with proteins!

# Glutaraldehyde in Practice

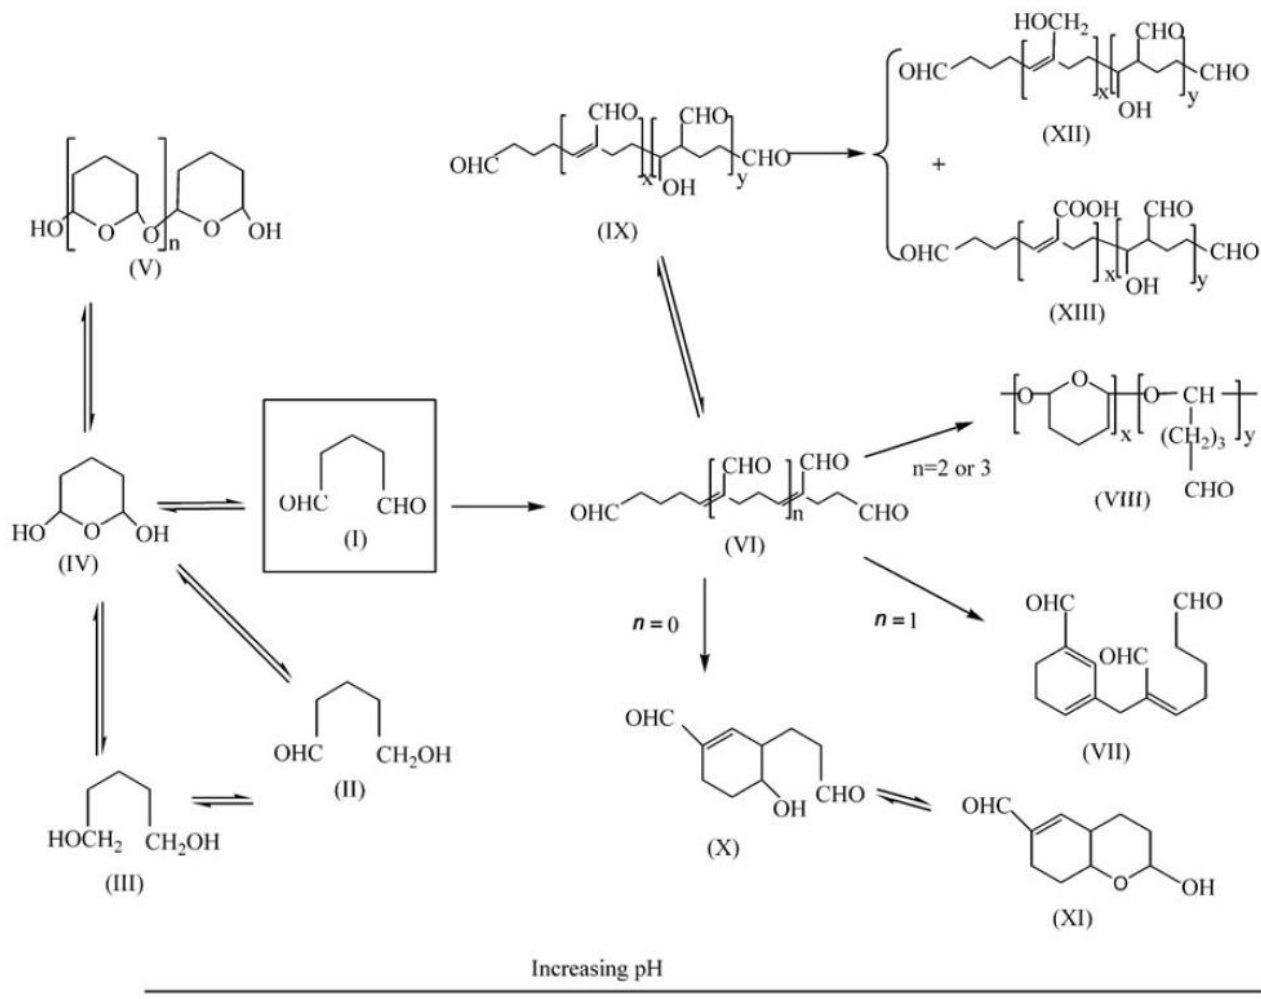

# Glutaraldehyde Reactions with Proteins

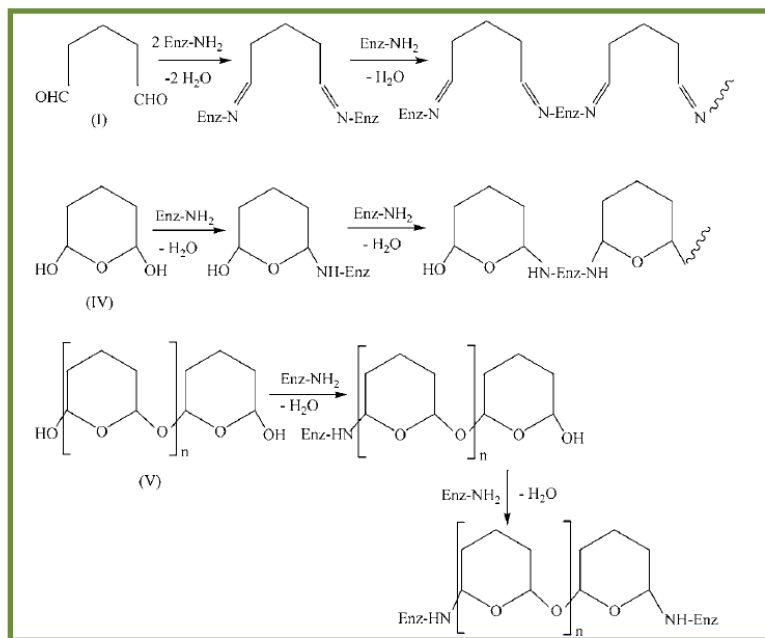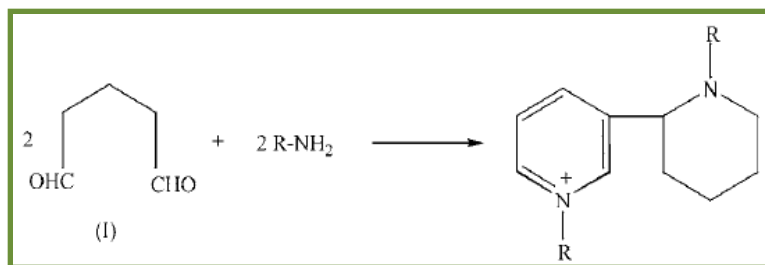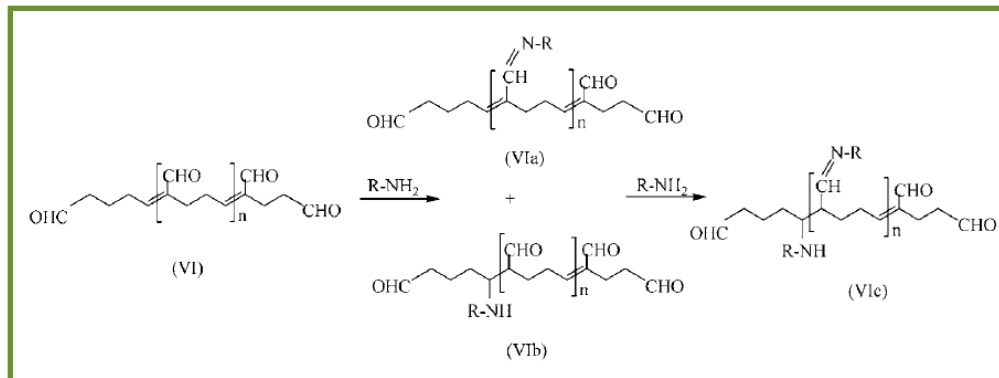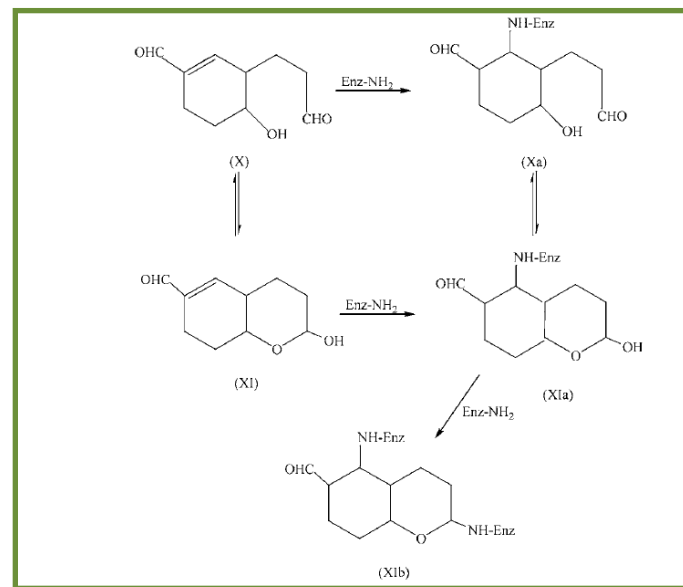

I. Migneault, *BioTechniques*, 37 (2004) 790

# Cross-Linking with Glutaraldehyde

- Common, inexpensive and effective protein cross-linking agent
- Cross-linking chemistry still not fully understood
- Type of covalent bond formed depends heavily on glutaraldehyde concentration, amine concentration, pH, and temperature
- Reduction of Schiff bases with  $\text{NaBH}_4$  or  $\text{NaCNBH}_3$  usually not necessary
- Other aldehyde cross-linkers, such as dextranpolyaldehyde generally do need a reduction step

# The CLEA Technology

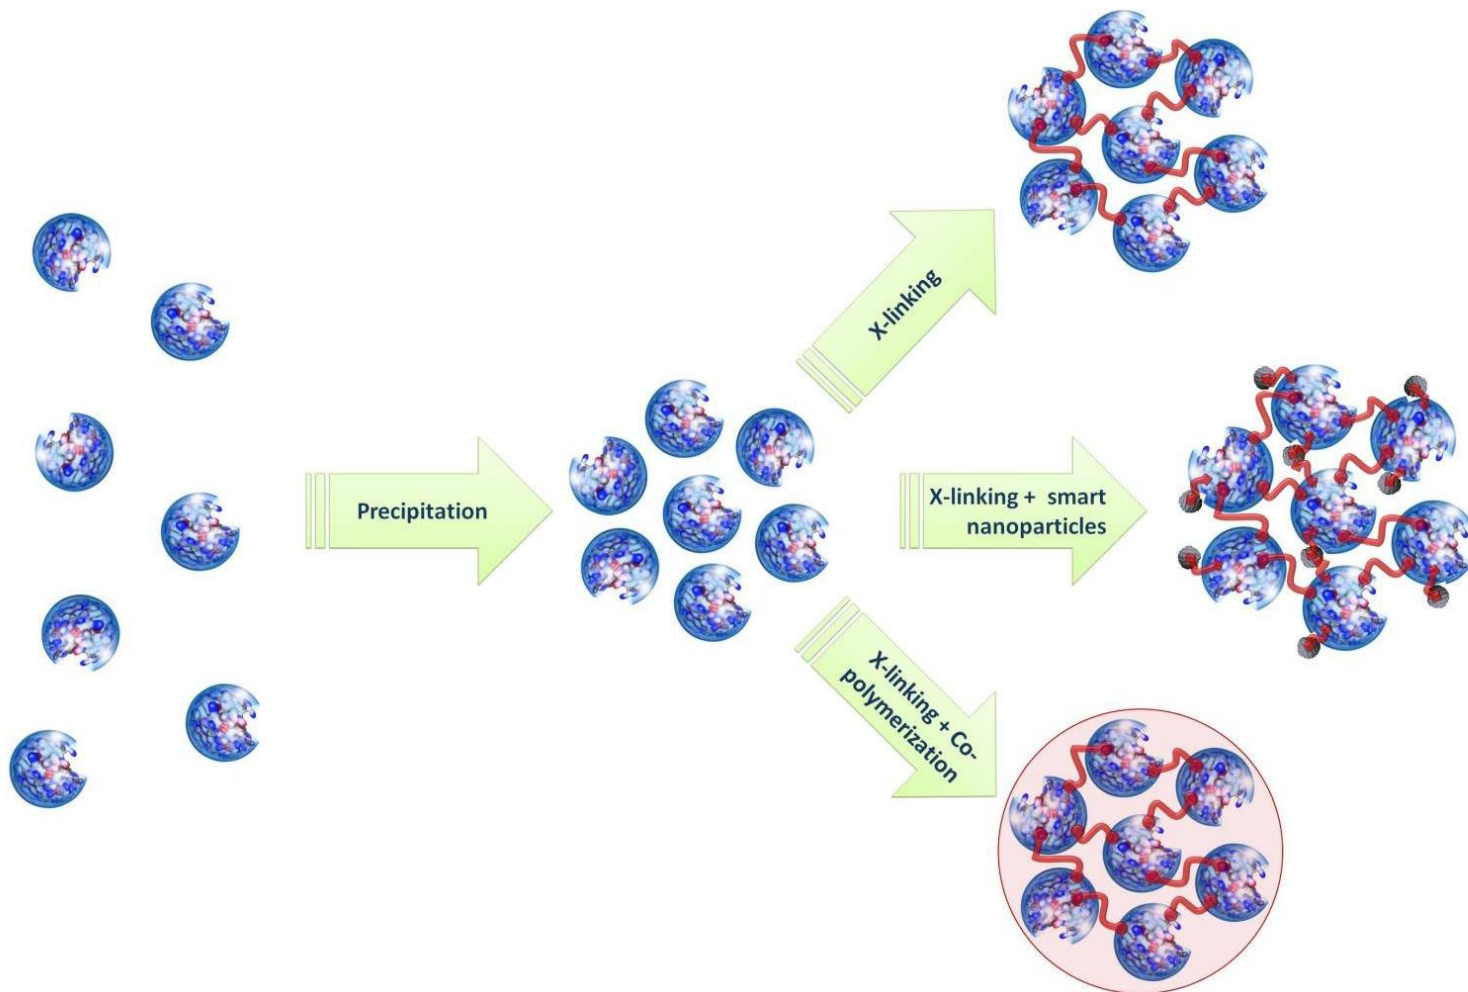

# Basic CLEA Properties

Very high enzyme loading

Particle size typically 5-50  $\mu\text{m}$

Good filterability and centrifugability

Packed bed possible

Mechanically robust

Excellent operational stability  
heat, organic solvents and proteolysis (autolysis)

Tuneable hydrophobicity/hydrophilicity

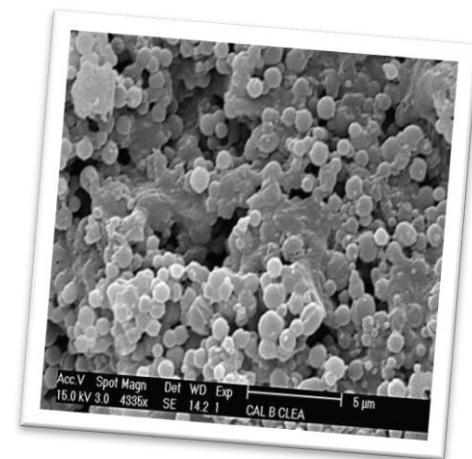

# Advantages of CLEAs

## 1. Improved properties

- Better storage and operational stability
- Hypoallergenic
- No leaching of enzyme in aqueous media

## 2. Cost-effective

- No need for pure enzyme (crude cell lysate sufficient)
- Easy recovery and recycle (easier DSP)
- High productivities (kg product/kg enzyme)

## 3. Broad scope & short time to market

# Magnetic CLEAs

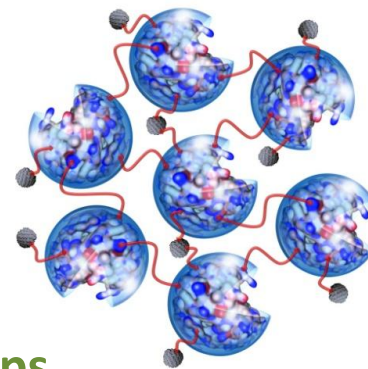

- Synthesis of magnetic nanoparticles in silica
- Functionalisation of nanoparticles with aminopropyl groups
- CLEAtion: cross-linking the enzyme and the nanoparticles

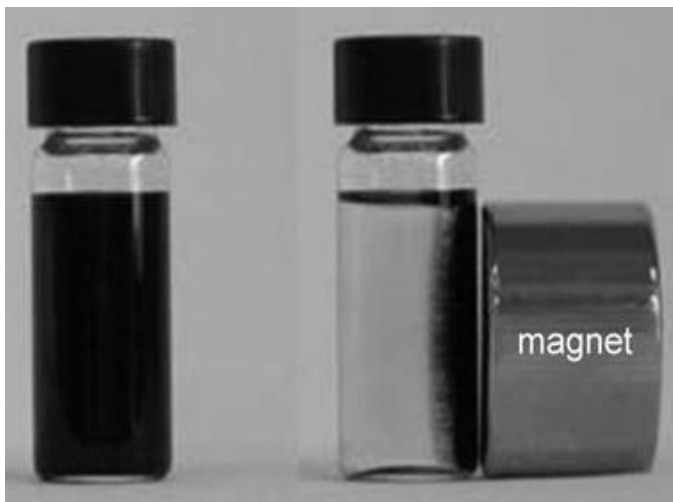

## Characteristics

- Magnetic decantation
- Magnetic strength can be adjusted
- No change in CLEA activity
- e.g. hydrolases, oxidoreductases, nitrile hydratases

# Additional Properties of mCLEAs

Separation of the enzyme catalyst by magnetic decantation

Magnetic strength of the mCLEA can be adjusted for the particular application

No changes in the structure by the introduction of magnetic particles

No changes in enzyme activity of the immobilised enzyme by the introduction of magnetic particles

mCLEA of any enzyme can be manufactured – currently examples with hydrolases and oxidoreductases

Potential application in the pharmaceutical, food and feed industries, and diagnostics

# Combi CLEAs

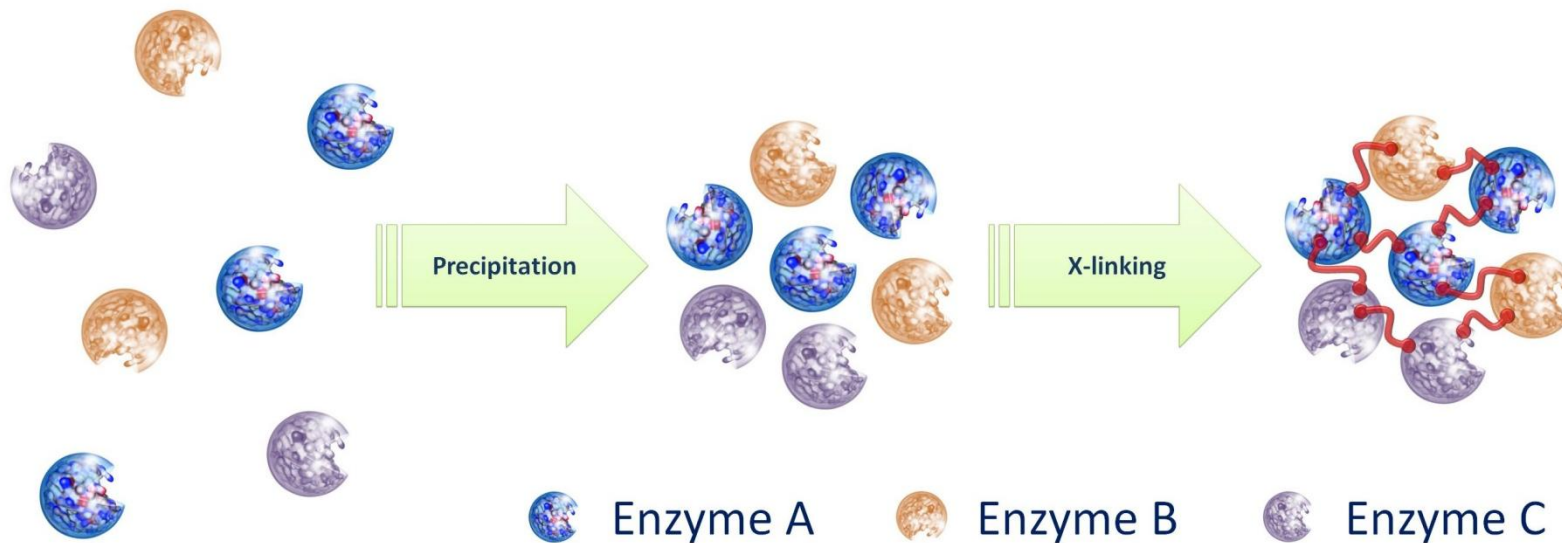

## Synthesis of CombiCLEAs

- Two or more enzymes in one CLEA
- Used for cascade reactions

# Storage Stability – NHase CLEA

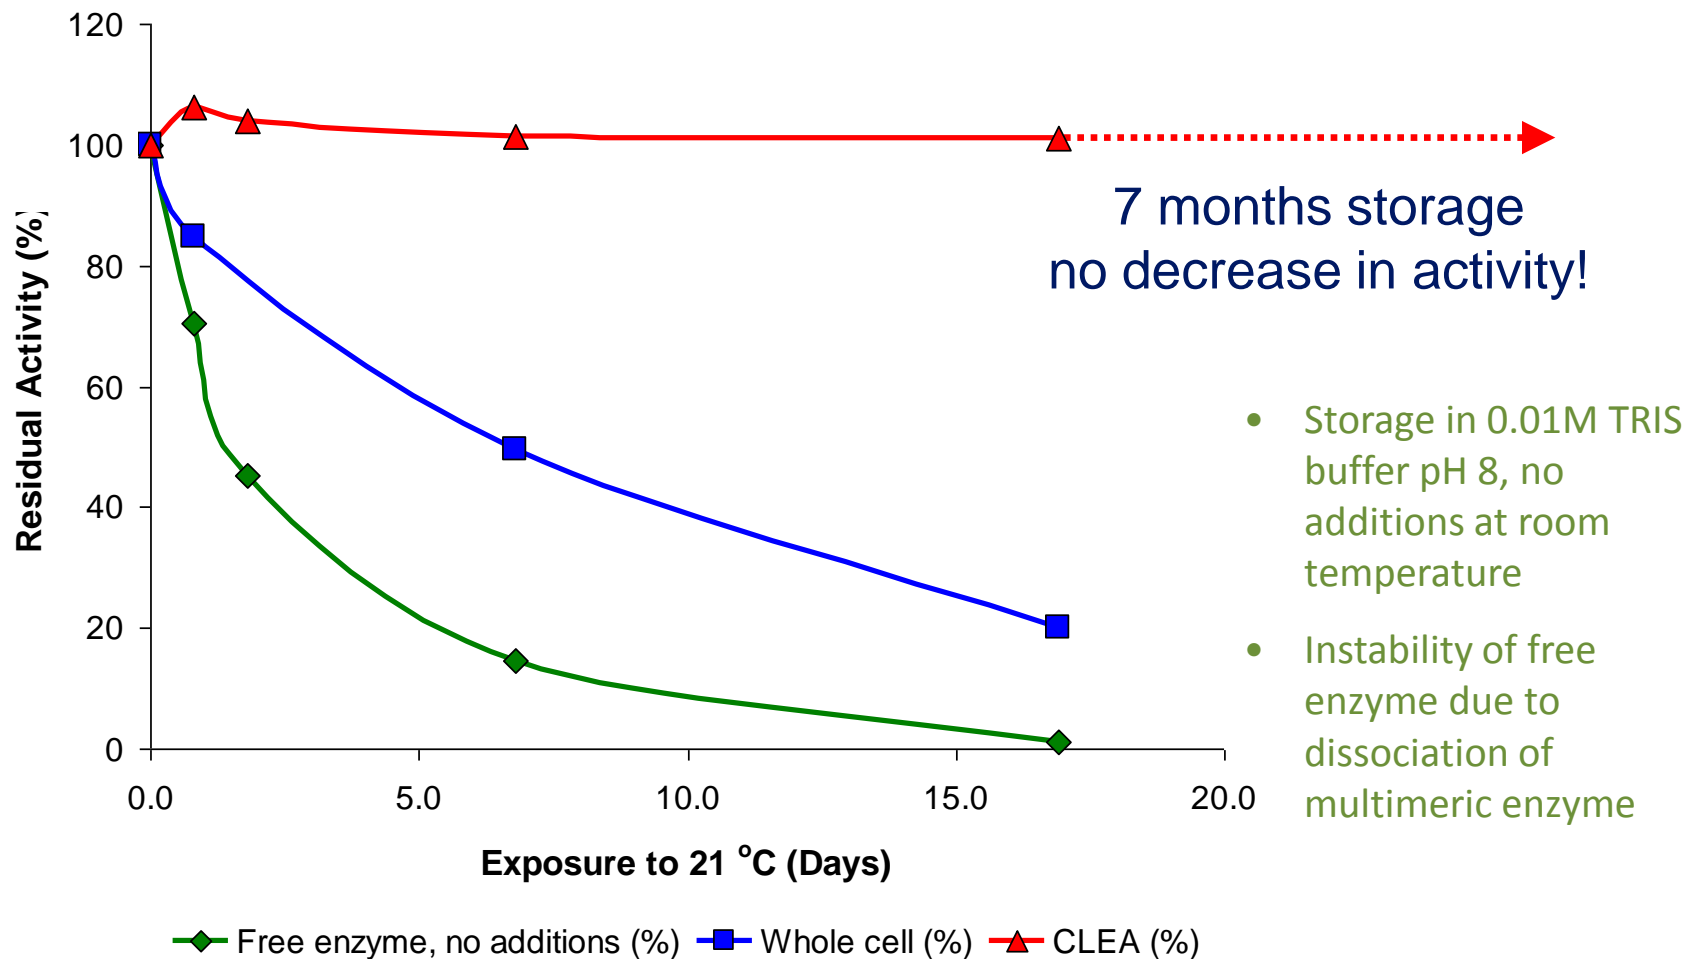

van Pelt, *Green Chem.* 10 (2008) 395-400

# Thermostability – Papain CLEA

- Papain (protease from *C. papaya*) incubated at pH 7 and 50 °C.

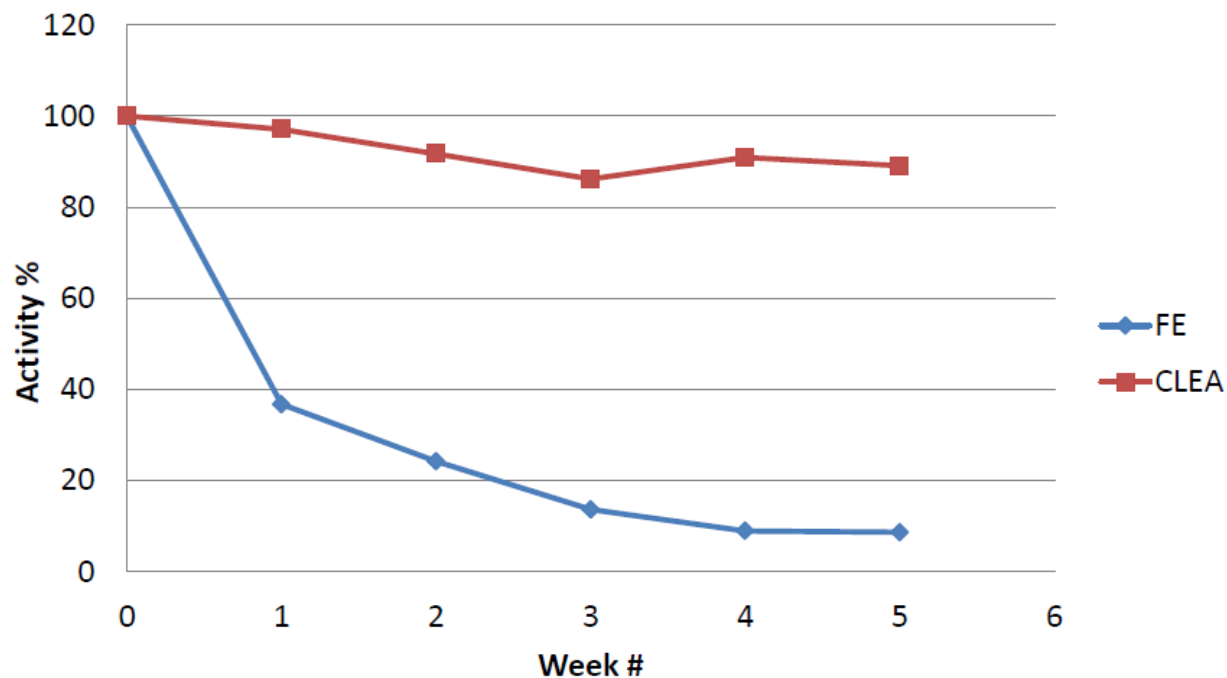

# Recyclability – PaHNL CLEA

- Effect of recycling on the performance of (R)-oxynitrilase CLEA in the hydrocyanation of *o*-chlorobenzaldehyde

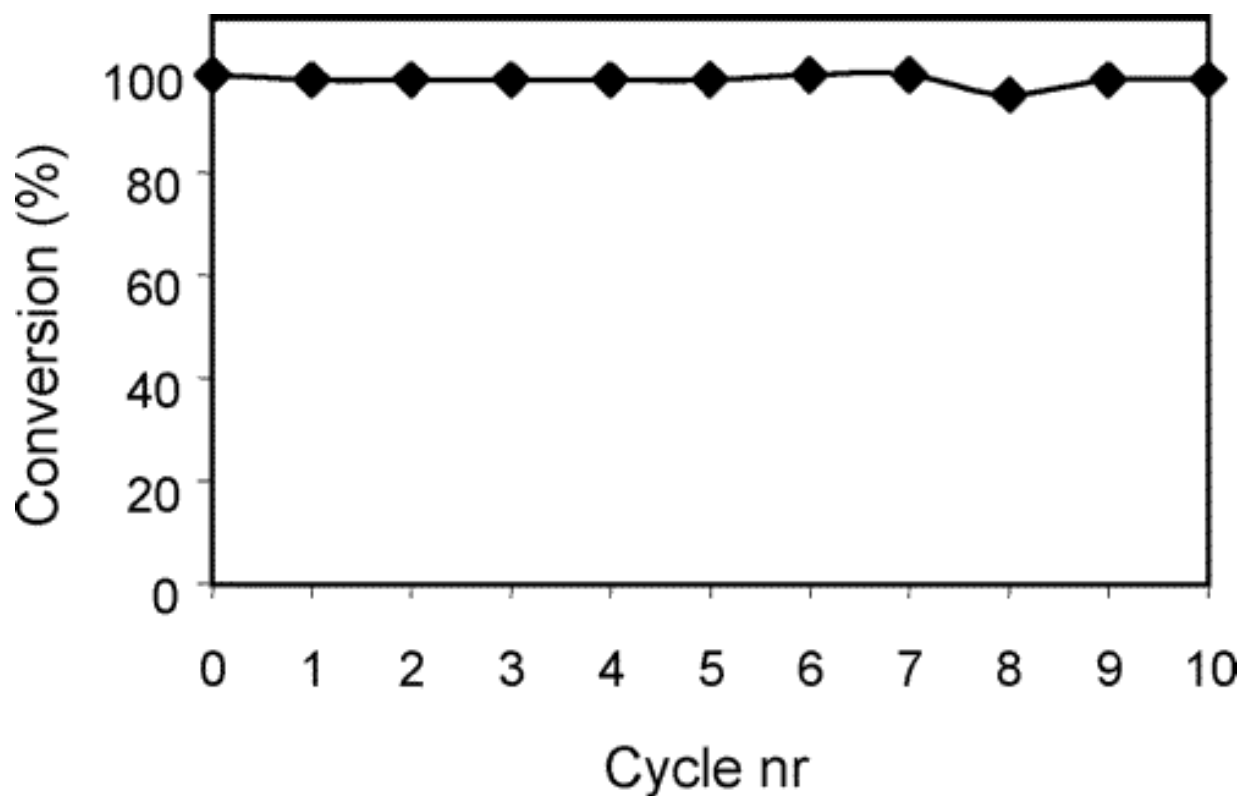

# Scope of the CLEA Technology

## Hydrolases

- Pen. Acylases (2)
- Lipases (19)
- Esterases (3)
- Proteases (9)
- Nitrilases (5)
- Aminoacylase
- Phytase
- Galactosidase
- Carbonic anhydrase

## Oxidoreductases

- KRED
- FDH
- Glucose oxidase
- Galactose oxidase
- Amino acid oxidase
- Laccase (3)
- Catalase
- Chloroperoxidase
- HRP

## Lyases

- *R*- & *S*- HNLases (5)
- PDC
- DERA
- Nitrile hydratase (9)

## Transferases

- Transaminases
  - (R) selective (3)
  - (S) selective (5)

# Scope of the Technology

## Hydrolases

- **Pen. Acylases** (2)
- **Lipases** (19)
- **Esterases** (3)
- **Proteases** (9)
- **Nitrilases** (5)
- **Aminoacylase**
- **Phytase**
- **Galactosidase**
- **Carbonic anhydrase**

# Hydrolases – Pen. Acylase

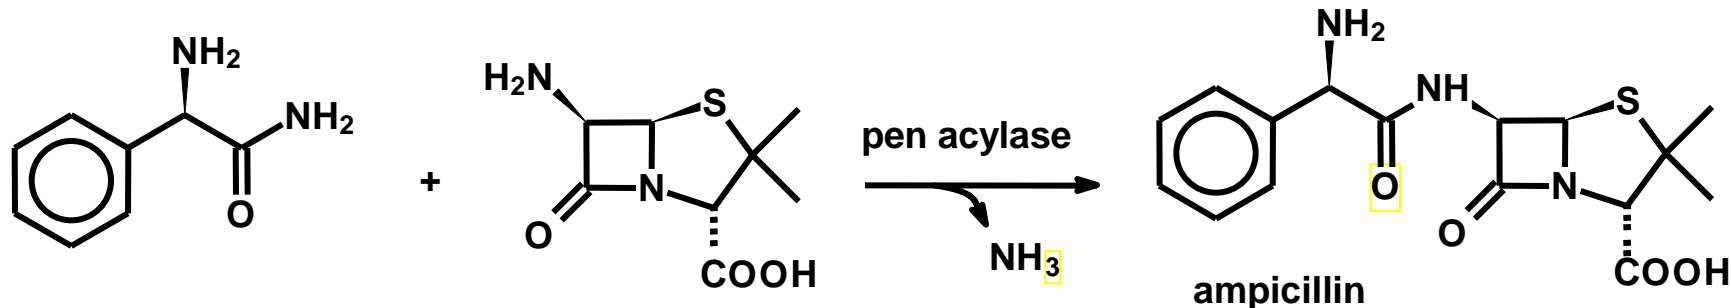

| Biocatalyst | Conv. (%) | S/H ratio | Rel. Productivity |
|-------------|-----------|-----------|-------------------|
| Free enzyme | 88        | 2.0       | 100               |
| T-CLEA      | 85        | 1.58      | 151               |
| PGA-450     | 86        | 1.56      | 0.8               |

Conclusion – High productivity and S/H

L.Cao, L.M.van Langen, F. van Rantwijk, and R.A.Sheldon, *J. Mol. Catal. B:Enzym.* 11 (2001) 665

# Hydrolases – Protease

- Alcalase CLEA : *B. licheniformis* protease
- Savinase CLEA: *B. clausii* protease
- Esperase CLEA: *B. lentus* protease
- BS CLEA : *B. subtilis* protease
- Papain CLEA : *C. papaya* protease
- Protease CLEA Discovery Platform

# Hydrolases - Proteases

## Antifouling Agent in Paint

- To replace toxic organotin compounds  
(banned in the EU since 2008)
- Cross-linked enzyme aggregates (CLEAs) of proteases were tested in artificial seawater (ASW) both as it is and as a component of the paint.
- It is found that all CLEAs have tolerance to xylene and have great stability in dried paint.
- The maximum increase in relative activity was found for CLEA *B.licheniformis*.
- CLEA *B.licheniformis* has shown 900% activation during storage in ASW.
- In the paint, non-modified subtilisin lost more than 90% of activity in 28 days.

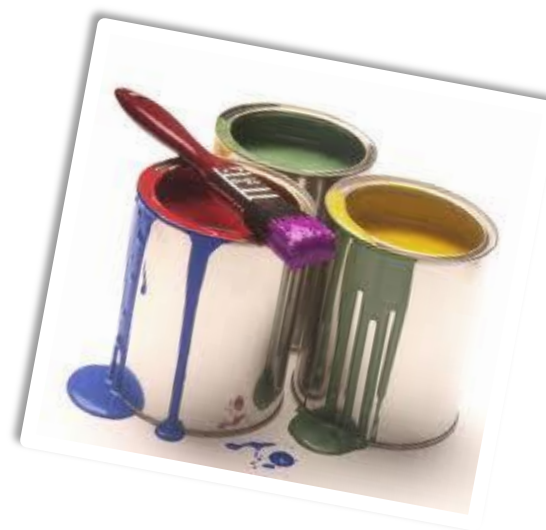

# Hydrolases – Proteases

## Amidation in Organic Media

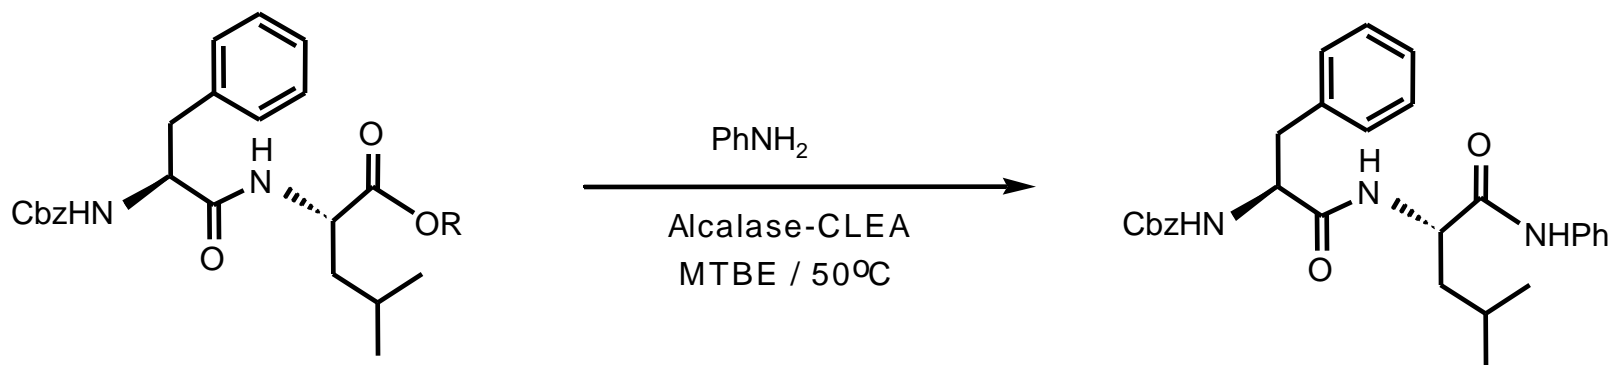

| R               | Yield (%) |
|-----------------|-----------|
| $\text{CH}_3$   | 93        |
| $\text{PhCH}_2$ | 94        |
| H               | 93        |

Nuijens, Cusan, Kruijtzter, Rijkers, Liskamp, Quaedflieg, *J. Org. Chem.* 74 (2009) 5145

# Regioselective Esterifications

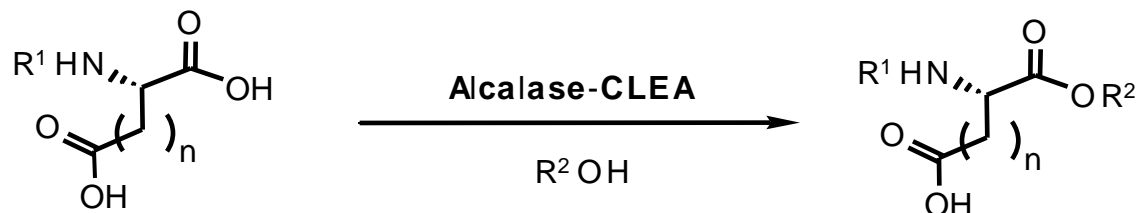

$n = 1$  or  $2$

$R^1 = \text{Cbz, Boc, Fmoc}$

$R^2 = \text{allyl, Me}_3\text{SiCH}_2\text{CH}_2-$

92-98% Yield

84-89% Isolated yield

Nuijens, Cusan, Kruijtzter, Rijkers, Liskamp, Quaedflieg, *Synthesis* (2009) 809

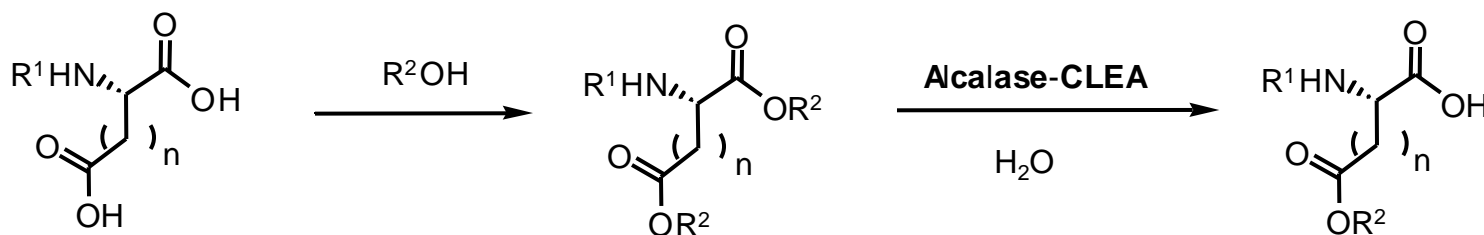

$n = 1$  or  $2$

$R^1 = \text{CBz, BOC, FMOC}$

$R^2 = \text{allyl or } (\text{CH}_3)_3\text{SiCH}_2\text{CH}_2-$

95-98% Yield

77-87% Isolated Yield

Nuijens, Kruijtzter, Cusan, Rijkers, Liskamp, Quaedflieg, *Tetrahedron Lett.* 50 (2009) 2719

# Peptide Synthesis

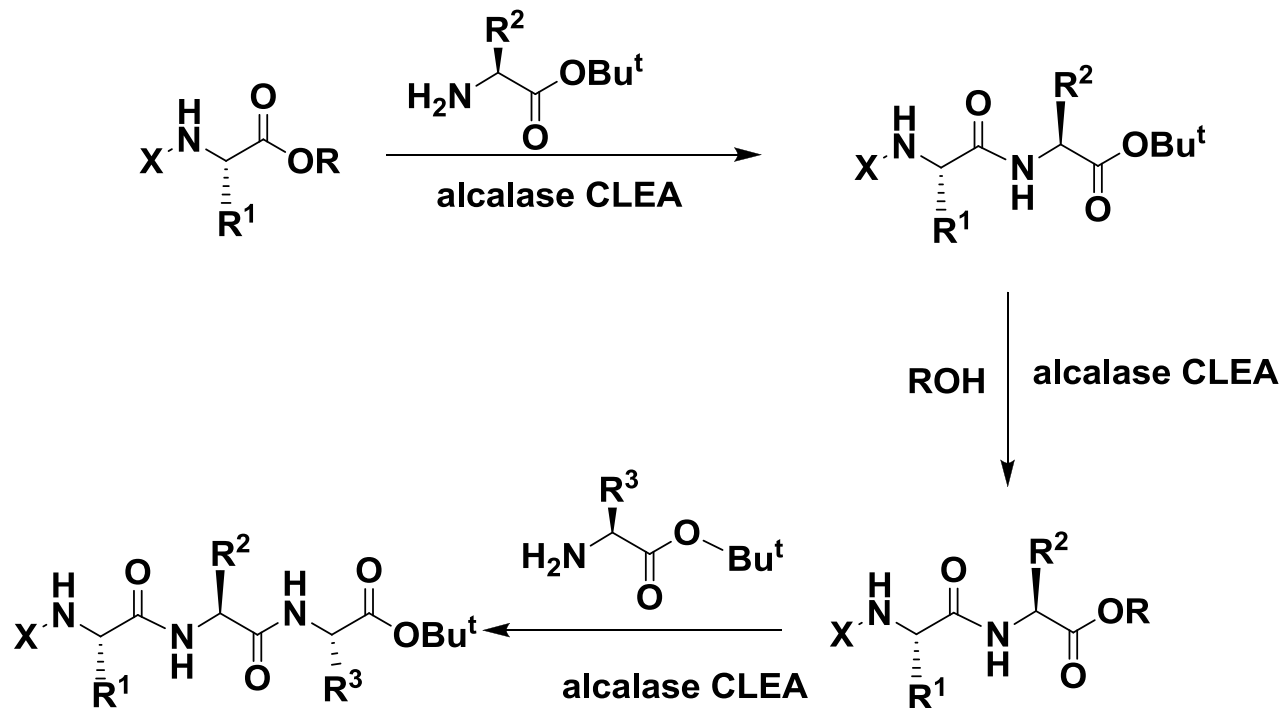

**X = N-protecting group**

**R<sup>1</sup>, R<sup>2</sup>, R<sup>3</sup> = amino acid side-chains**

Nuijens et al, *Advan. Synth. Catal.* 352 (2010) 2399 – 2404

# Resolution of Amino Ester with Alcalase-CLEA

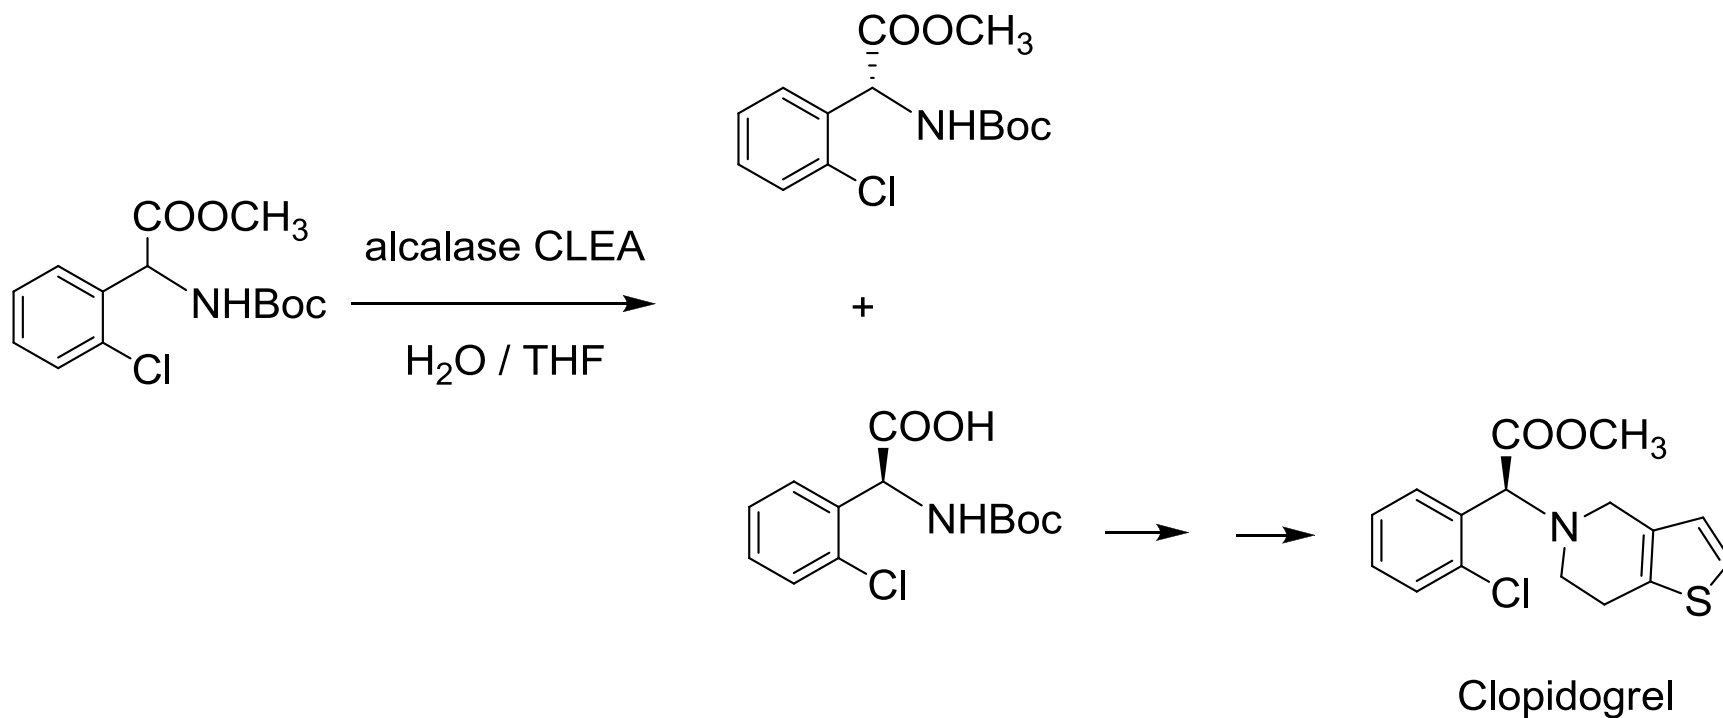

# *Rhodococcus erythropolis* amidase CLEA: Enantioselective Hydrolysis (Astra Zeneca)

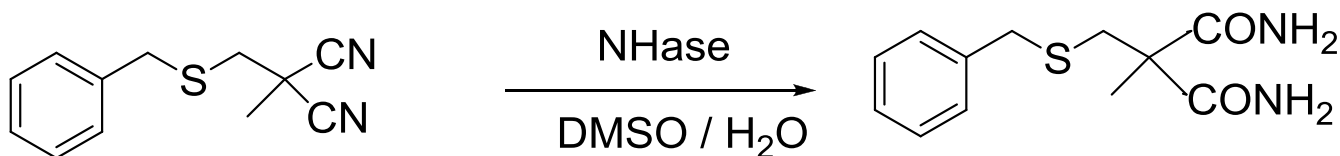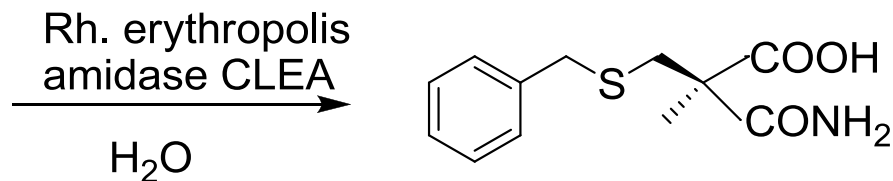

85% yield  
93% ee

A. Wells, presented at the SCI Meeting on *Biocatalysis & Biotransformations*, London, October 14, 2010

# Hydrolases - Lipases

- *Candida antarctica* lipase B (CaLB)
- *Candida antarctica* lipase A (CaLA)
- *Thermomyces lanuginosus* (Lipolase)
- *Rhizomucor miehei*
- *Candida rugosa*
- *Alcaligenes* sp.
- *Pseudomonas stutzeri*

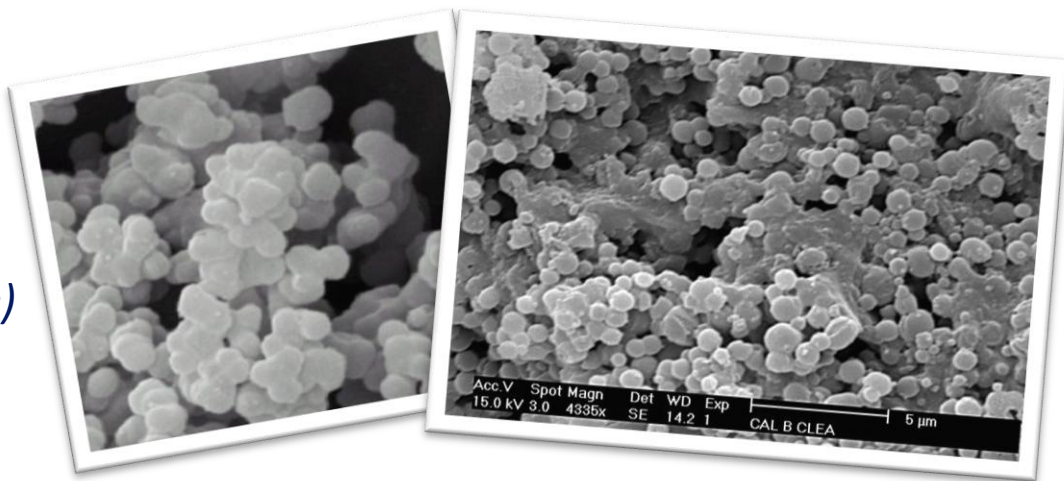

## *Candida antarctica* Lipase B CLEA

The only commercially available immobilized form of CaL B completely stable to leaching in water

**Lipase CLEA discovery platform**

# Hydrolases - Lipases

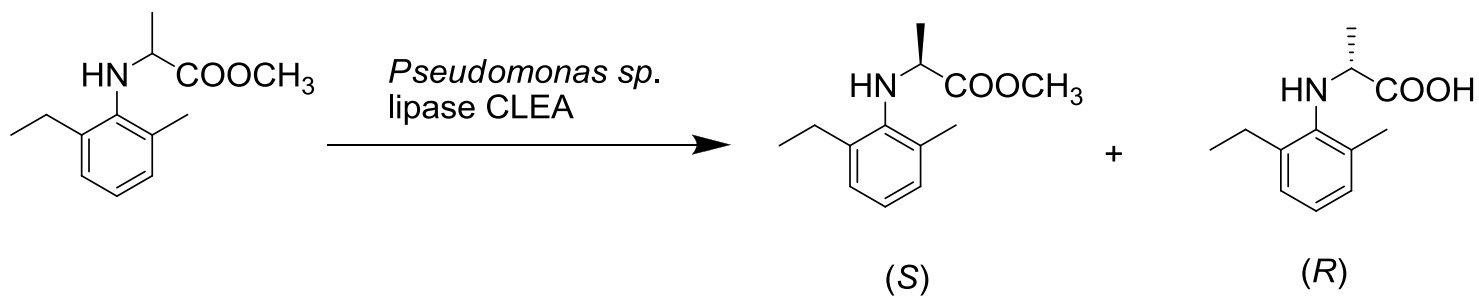

E value = > 100

Zhao, L. et al. *J. Mol. Catal. B: Enzymatic* 54 (2008) 7

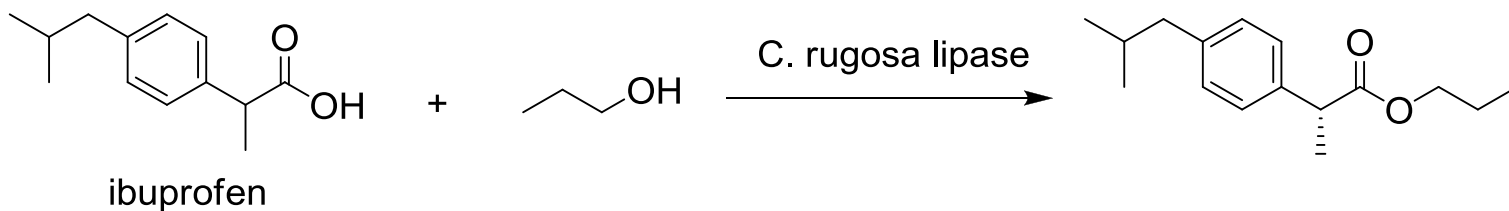

Free enzyme    E = 13  
CLEA            E = 23

Yu, H. W. et al. *J. Mol. Catal. B: Enzymatic*

# Hydrolases - Lipases

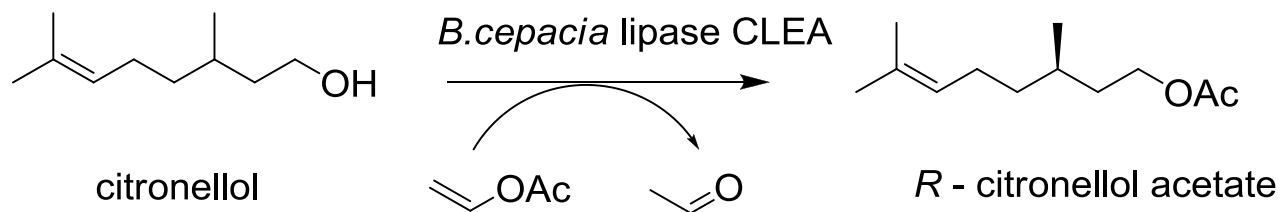

Free Enzyme E = 19  
CLEA E = 74

Majumder, A. B., Mondal, K., Singh, T. P., Gupta, M. N. *Biocat. Biotrans* 26 (2008) 235

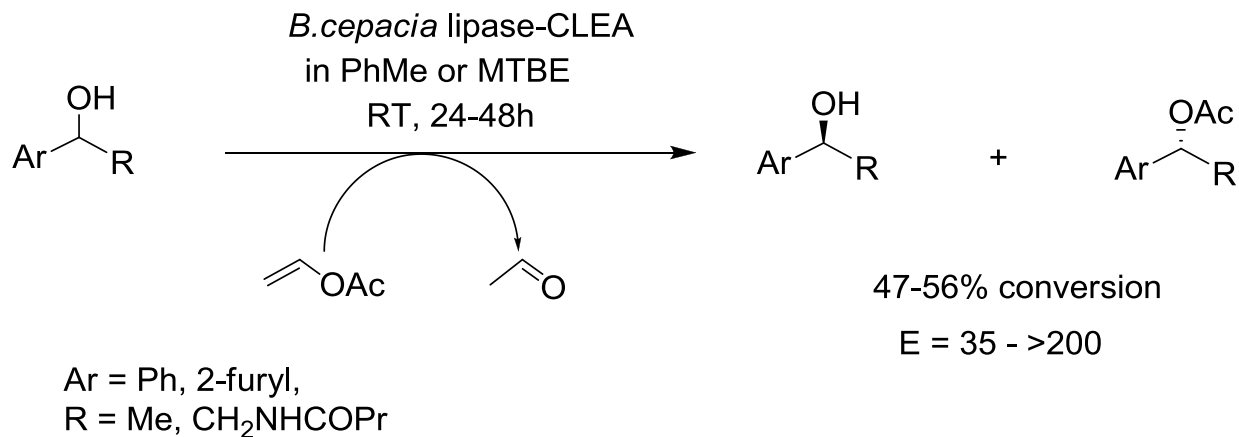

P. Hara, U. Hanefeld, L. T. Kanerva, *J. Mol. Catal. B: Enzymatic* 50 (2008) 80

# Hydrolases - Lipases

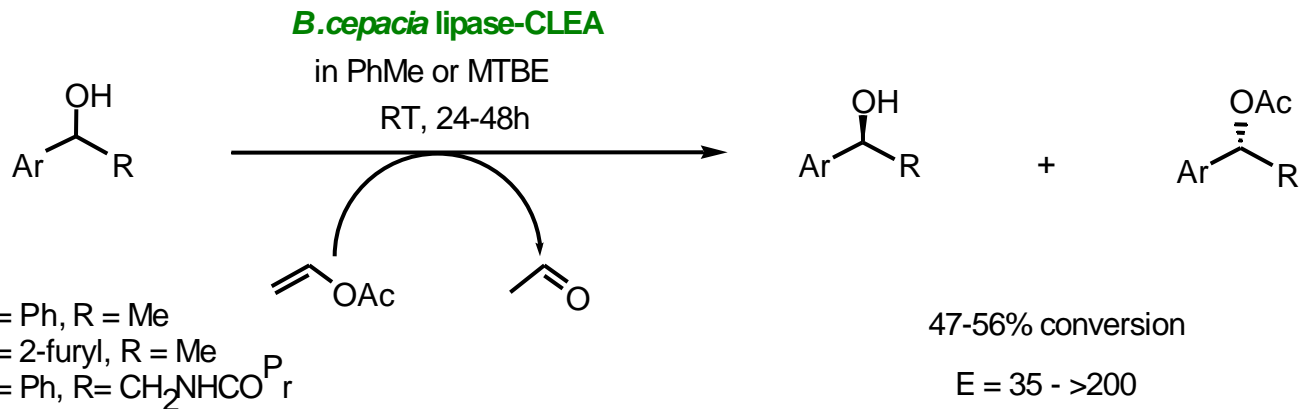

P. Hara, U. Hanefeld, L. T. Kanerva, *J. Mol. Catal. B: Enzymatic* 50 (2008) 80

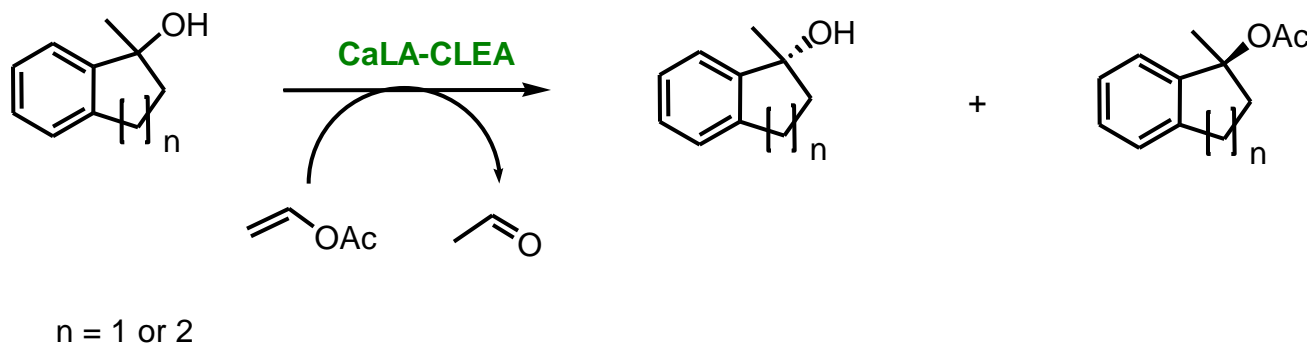

D. Özdemirhan, S. Sezer, Y. Sönmez, *Tetrahedron Asymm.* 19 (2008) 2717

# Hydrolases - Lipases

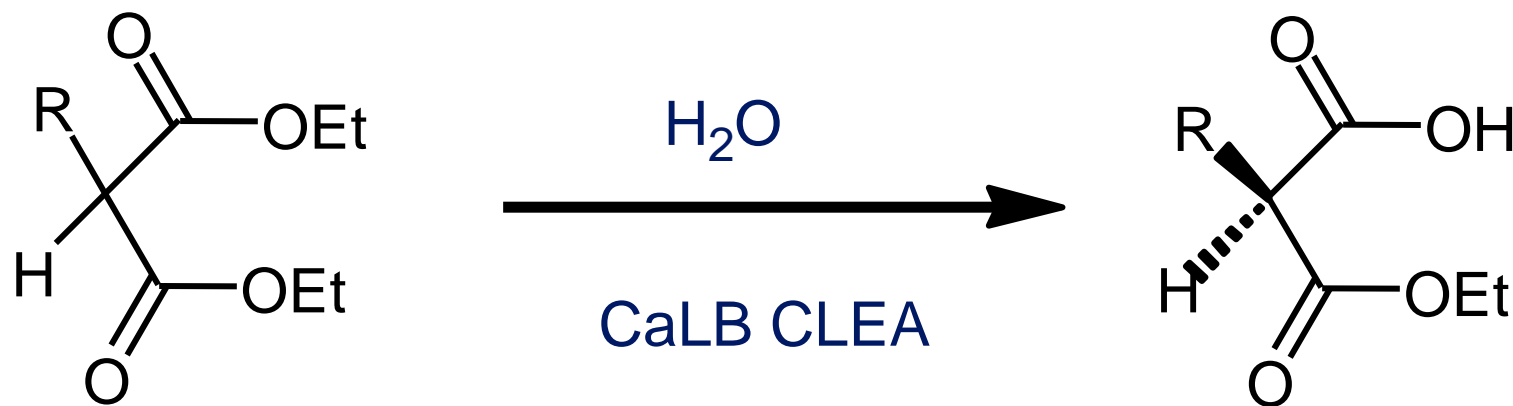

CaL B CLEA in a Fixed Bed Reactor  
100% activity after >300 h on stream

K. Robins, Lonza

# CaLB CLEA in Organic Media

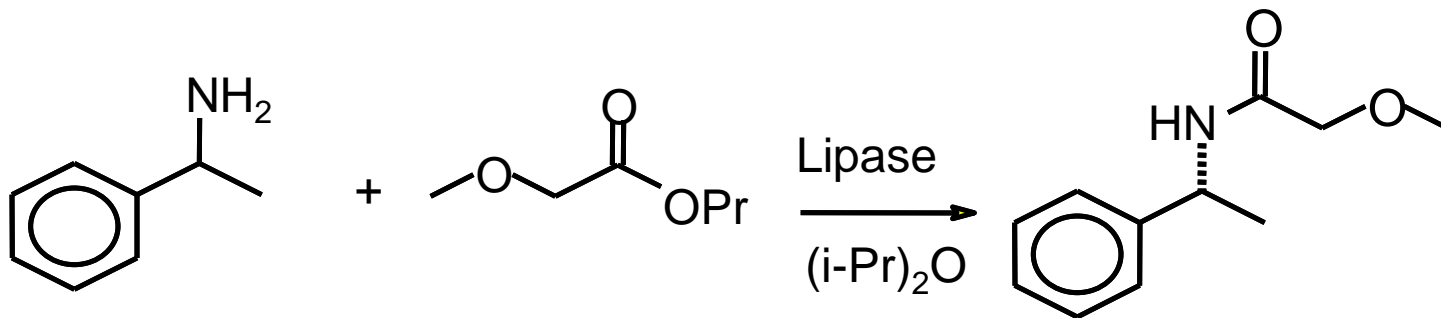

|               | Activity in H <sub>2</sub> O<br>(U/g) | Activity in (i-Pr) <sub>2</sub> O<br>(U/g) | Ratio |
|---------------|---------------------------------------|--------------------------------------------|-------|
| CaL B CLEA-ST | 38000                                 | 50                                         | 21    |
| CaL B CLEA-OM | 31000                                 | 1500                                       | 760   |
| Novozym 435   | 7300                                  | 250                                        | 29    |

# CaLB CLEA in scCO<sub>2</sub>

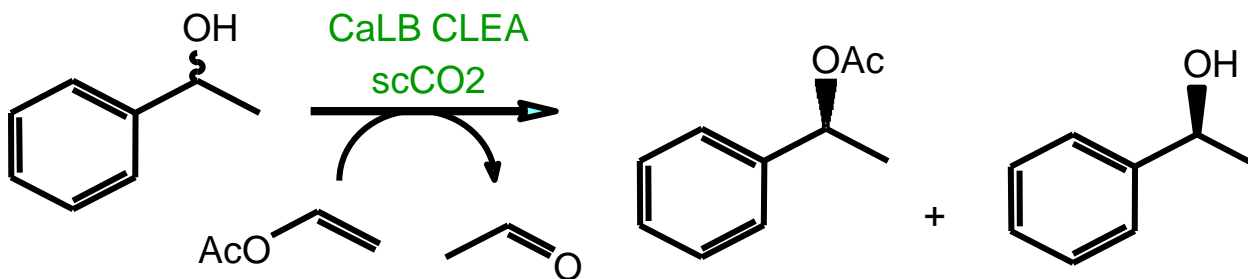

| Catalyst    | Conversion (%) | E   |
|-------------|----------------|-----|
| Novozym 435 | 17             | 280 |
| CaL B CLEA  | 48             | 640 |

H.R. Hobbs, M. Poliakoff, R.A. Sheldon, et al., *Green Chem.* 8 (2006) 816

# CaLB CLEA in Ionic Liquid

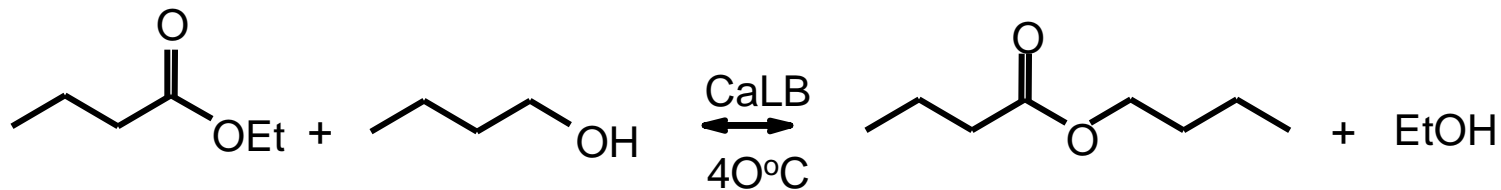

| Solvent      | Lipase     | Time (h) | Conv. (%) |
|--------------|------------|----------|-----------|
| t-BuOH       | Nov 435    | 6        | 83        |
| [bmim][dca]* | Nov 435    | 24       | 0         |
| t-BuOH       | CaL B CLEA | 3        | 83        |
| [bmim][dca]  | CaL B CLEA | 6        | 80        |

\*dca = (CN)<sub>2</sub>N

A. Ruiz Toral, F. van Rantwijk, R. A. Sheldon et al, *Enz. Microb. Technol.* 40 (2007) 1095-1099

# Scope of the Technology

## Hydrolases

- Pen. Acylases (**2**)
- Lipases (**19**)
- Esterases (**3**)
- Proteases (**9**)
- Nitrilases (**5**)
- Aminoacylase
- Phytase
- Galactosidase
- Carbonic anhydrase

## Oxidoreductases

- KRED
- FDH
- **Glucose oxidase**
- Galactose oxidase
- Amino acid oxidase
- **Laccase (3)**
- **Catalase**
- Chloroperoxidase
- HRP

# Oxidoreductases – Combi CLEA

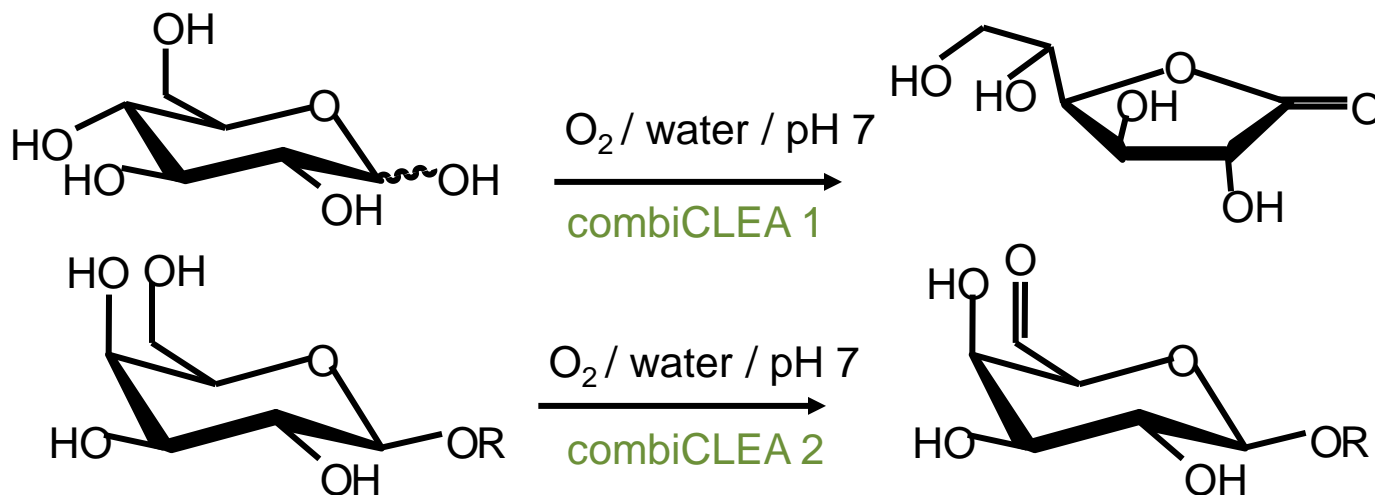

| Activity            | Free enzyme | CLEA |
|---------------------|-------------|------|
| 1 <sup>st</sup> use | 100%        | 100% |
| 2 <sup>nd</sup> use | -           | 100% |

**combiCLEA 1 = Glucose oxidase / catalase**

**combiCLEA 2 = Galactose oxidase / catalase**

# Oxidoreductases – Laccase

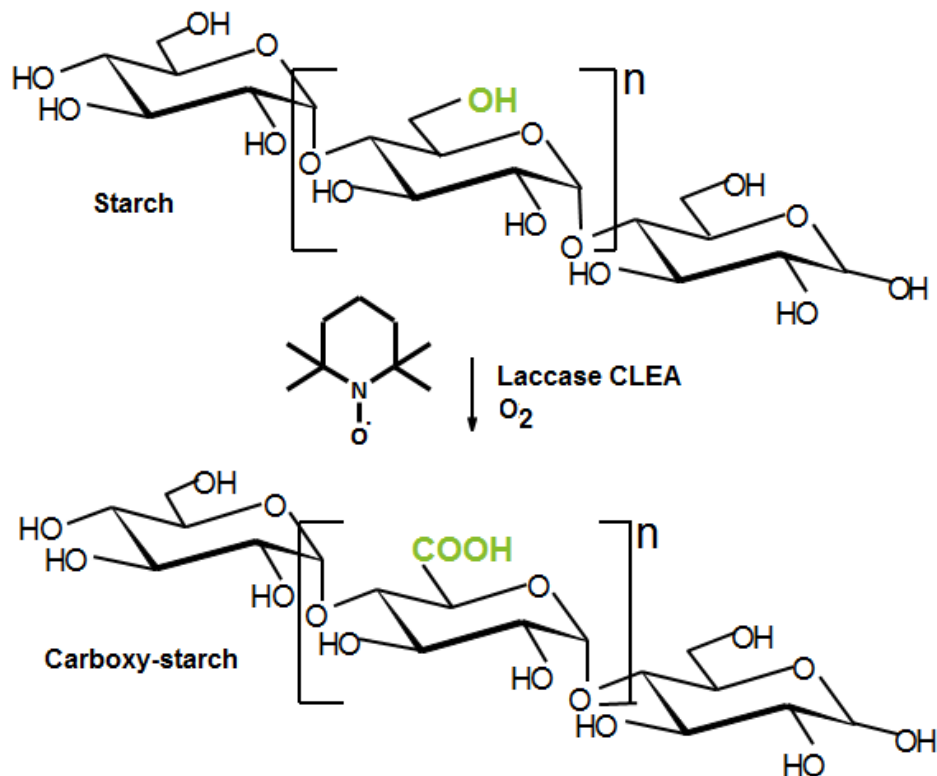

- TEMPO/NaOCl environmentally unfriendly
- Laccase / TEMPO /  $\text{O}_2$  :
  - Green Alternative
  - Enzyme costs too high  
(owing to suicide inactivation)
- Increase operational stability with a laccase CLEA
  - Recycle
- Also with cellulose to carboxycellulose (shampoo)

# Scope of the Technology

## Hydrolases

- Pen. Acylases (2)
- Lipases (19)
- Esterases (3)
- Proteases (9)
- Nitrilases (5)
- Aminoacylase
- Phytase
- Galactosidase
- Carbonic anhydrase

## Oxidoreductases

- KRED
- FDH
- Glucose oxidase
- Galactose oxidase
- Amino acid oxidase
- Laccase (3)
- Catalase
- Chloroperoxidase
- HRP

## Lyases

- *R- & S- HNLases* (5)
- PDC
- DERA
- **Nitrile hydratase** (9)

# Lyases – Hydroxynitrile Lyases

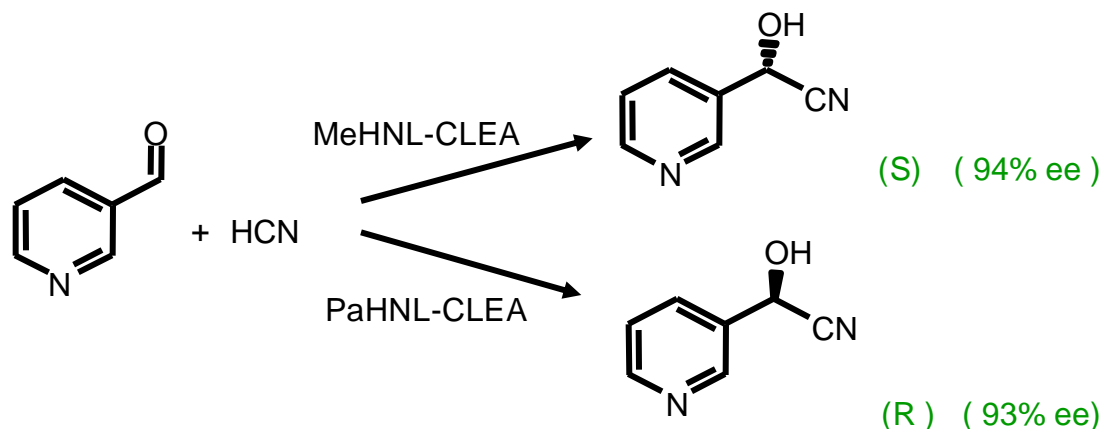

- Low reaction temp. (5°C)
- Microaqueous environment (0.18% H<sub>2</sub>O in DCM)
- Immobilization as a CLEA

"The use of a dichloromethane reaction system with **enzyme aggregates** and free hydrogen cyanide was crucial in improving cyanohydrin stereoselectivity through minimizing background racemic cyanide addition and enzyme-catalyzed racemization of the product."\*

\*C. Roberge, F. Fleitz, D. Pollard, P. Devine, *Tetrahedron Letters* 48(8) (2007) 1473-1477

# Lyases – Combi CLEA

## Step Economy a Tri-enzymatic Cascade with a Triple-Decker Combi CLEA

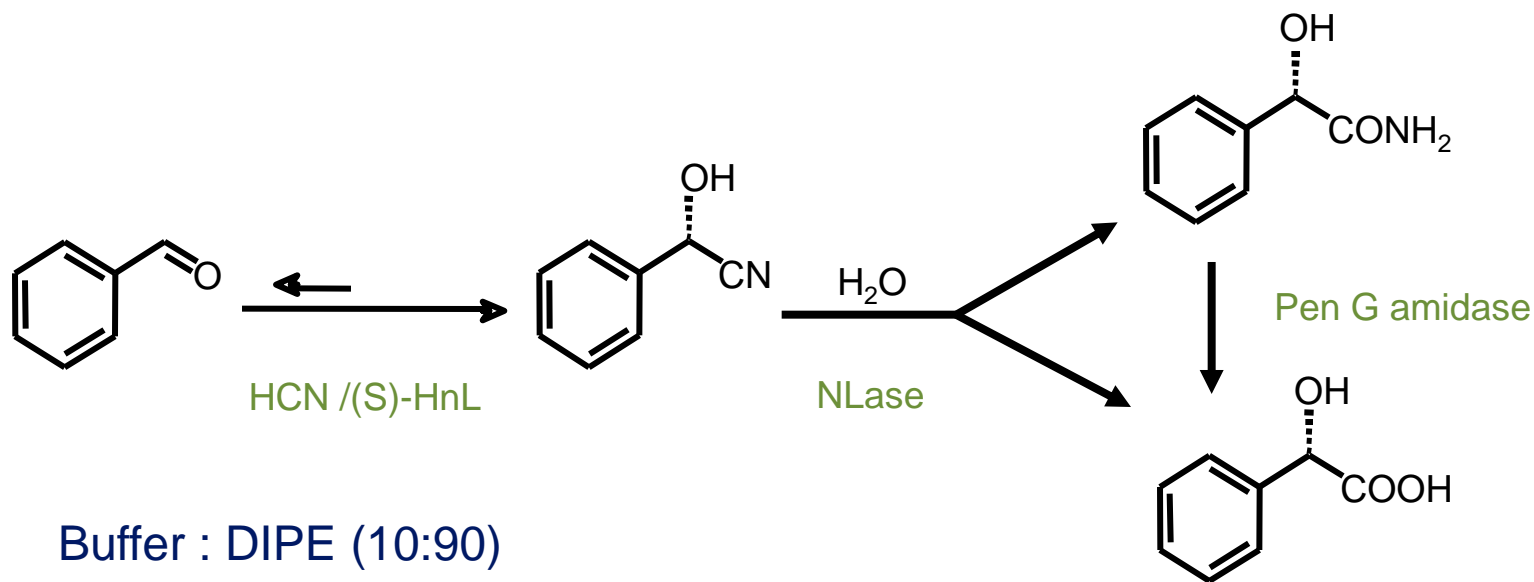

- Buffer : DIPE (10:90)
- pH 5.5 / RT / < 5h
- HnL/ NLase / Pen.acylase Combi-CLEA
- Conv. 96% / ee >99%

# NHase CLEA Formation

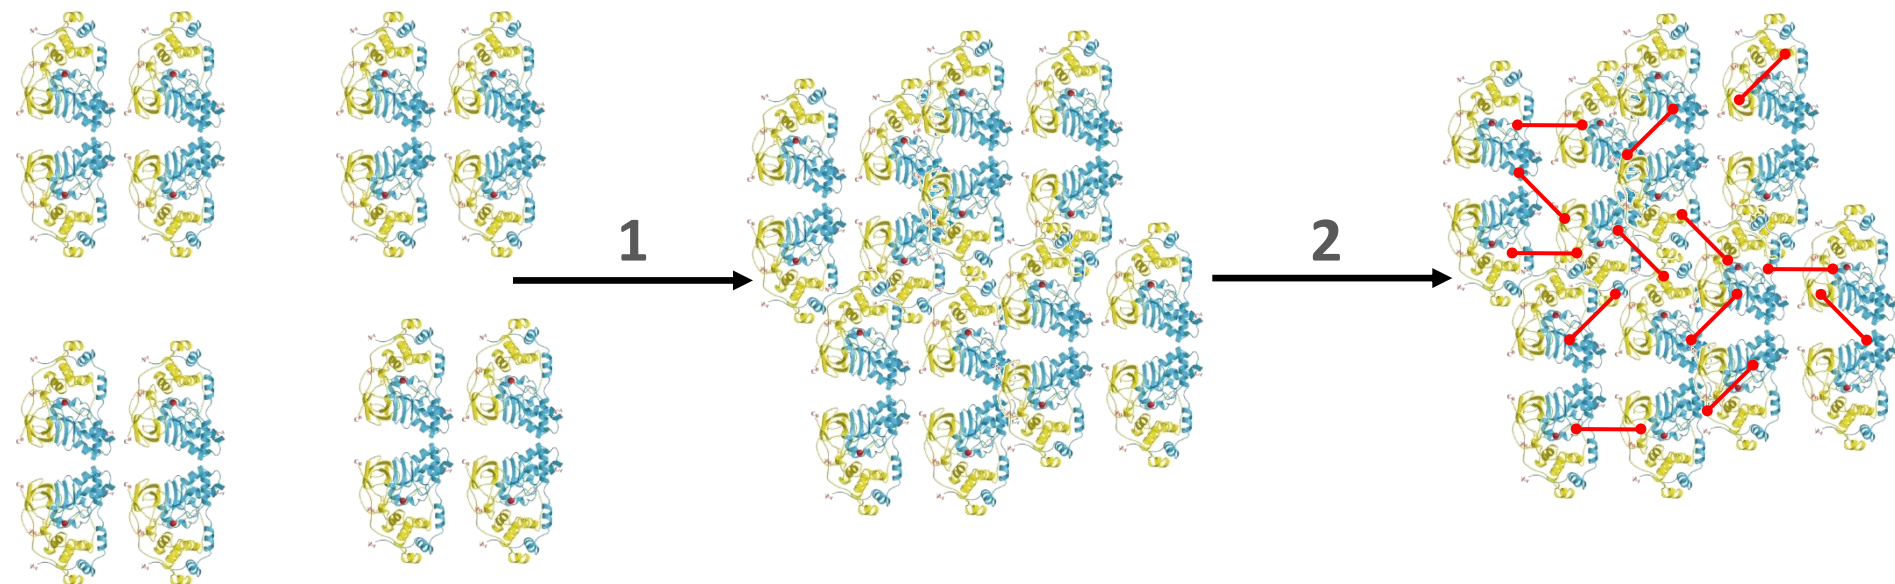

(1) Aggregation/purification using ammonium sulfate

(2) Cross linking using glutaraldehyde

Remaining activity in CLEA: >50%

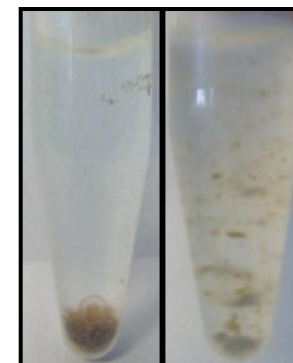

# Lyases – Nitrile Hydratase

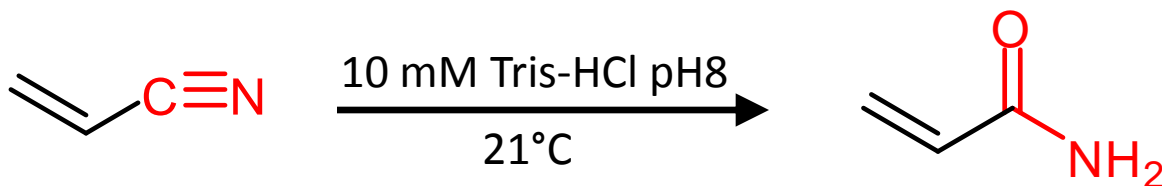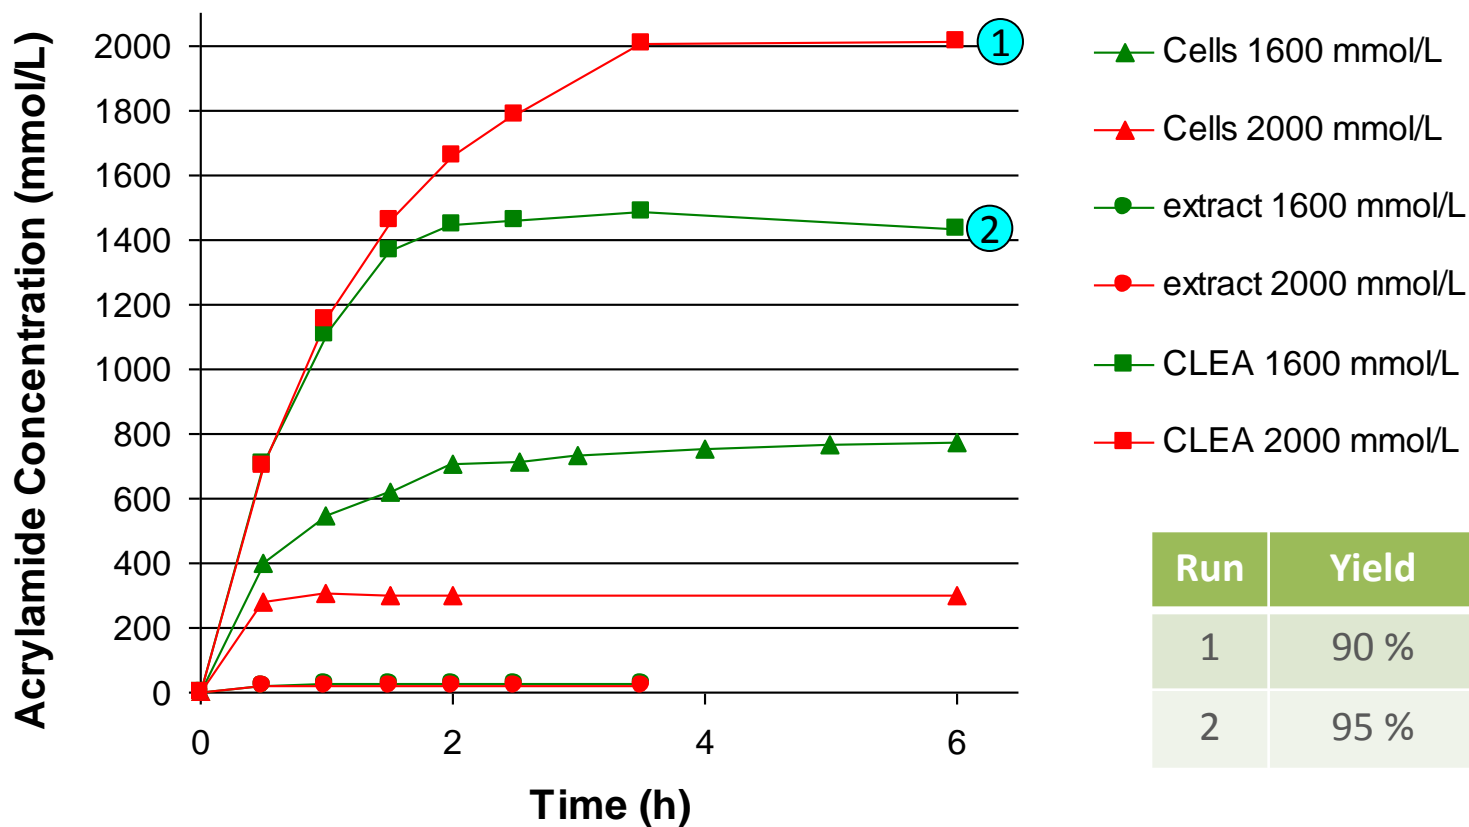

# Fed-Batch Production Acrylamide

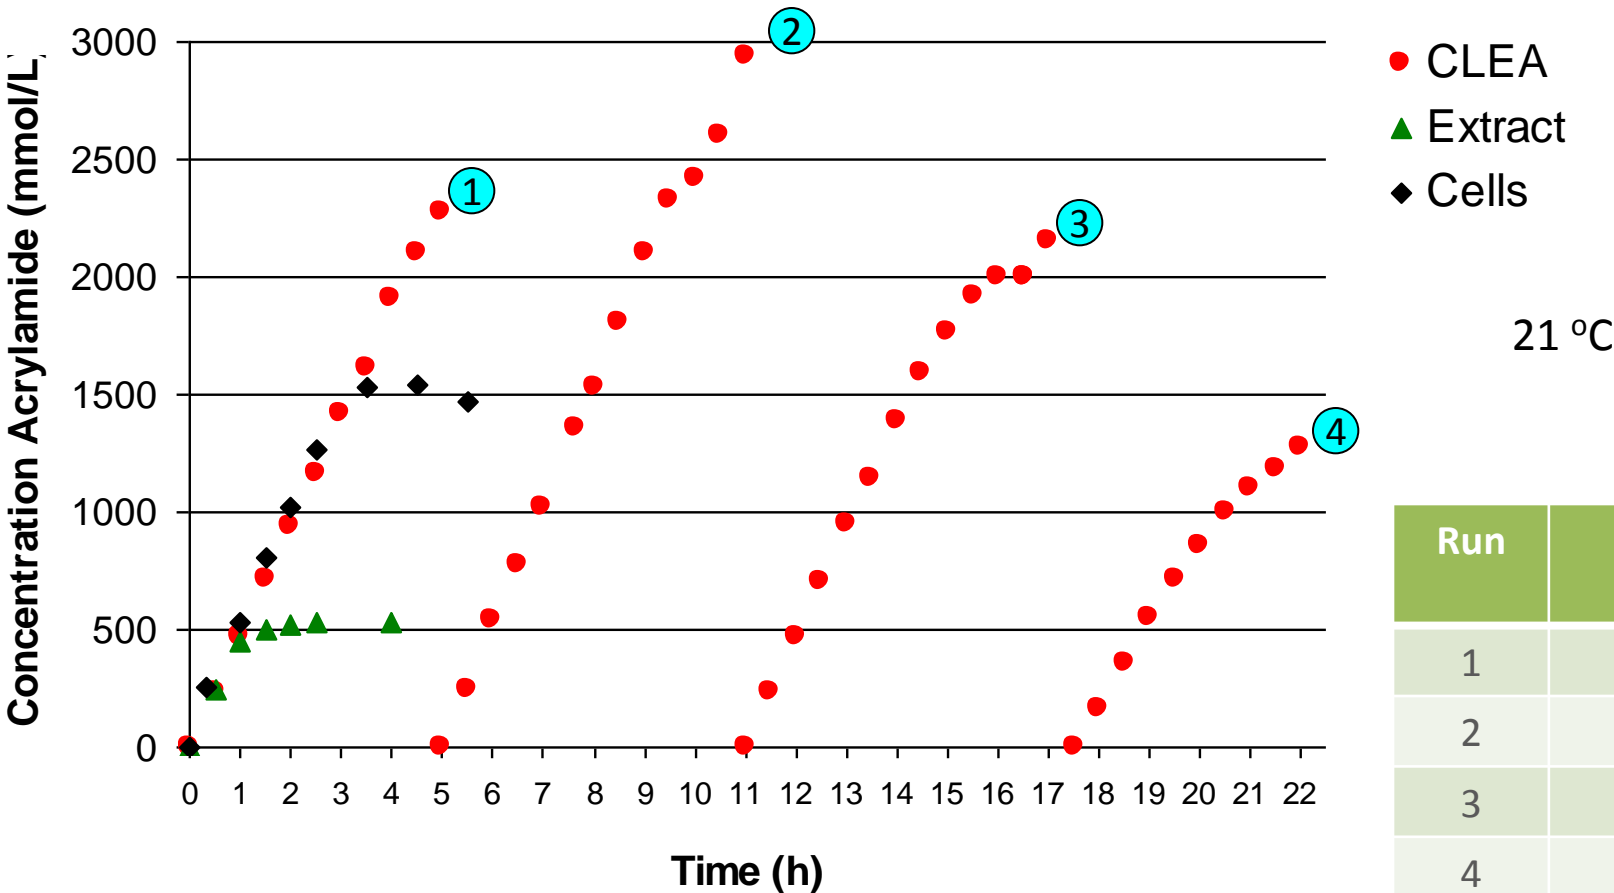

# NHases - Storage and Recycle Stability

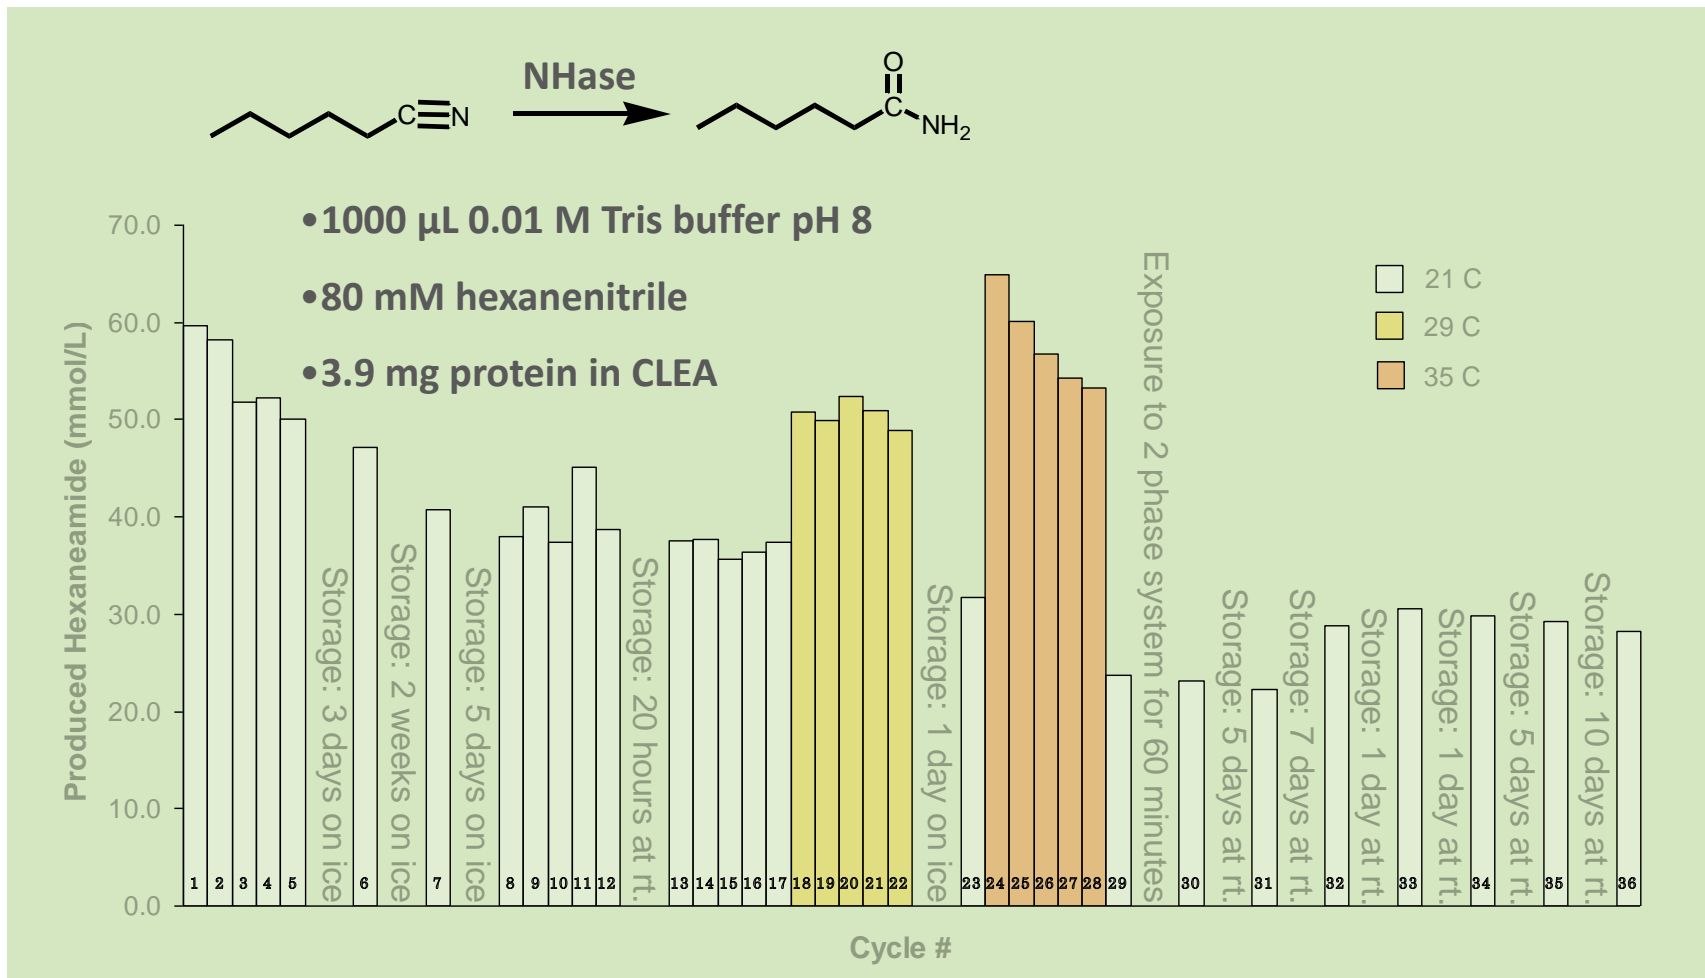

# Scope of the Technology

## Hydrolases

- Pen. Acylases (2)
- Lipases (19)
- Esterases (3)
- Proteases (9)
- Nitrilases (5)
- Aminoacylase
- Phytase
- Galactosidase
- Carbonic anhydrase

## Oxidoreductases

- KRED
- FDH
- Glucose oxidase
- Galactose oxidase
- Amino acid oxidase
- Laccase (3)
- Catalase
- Chloroperoxidase
- HRP

## Lyases

- *R*- & *S*- HNLases (5)
- PDC
- DERA
- Nitrile hydratase (9)

## Transferases

- **Transaminases**
  - (R) selective (3)
  - (S) selective (5)

# Transferases - Transaminases

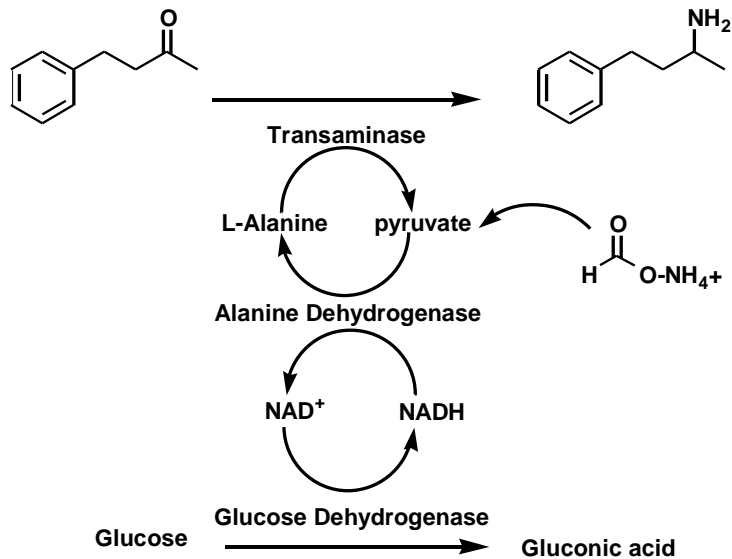

- Combi CLEA – TAm and AlaDH

Conversion to MPPA after 24 h

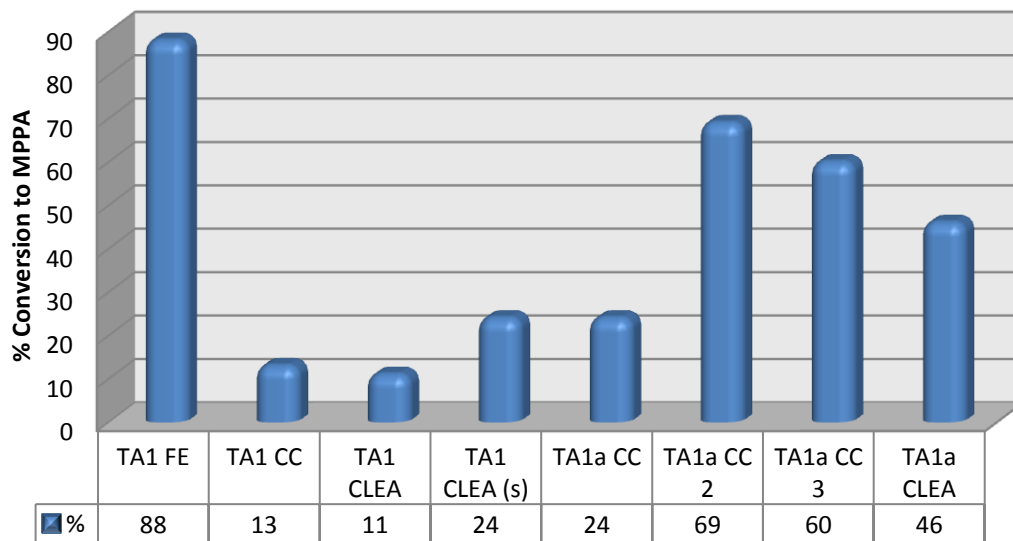

# Triple Combi CLEAs

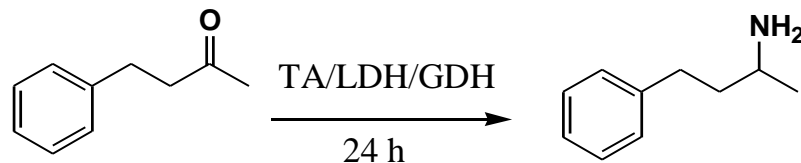

Comparison to FE (TA:LDH:GDH)

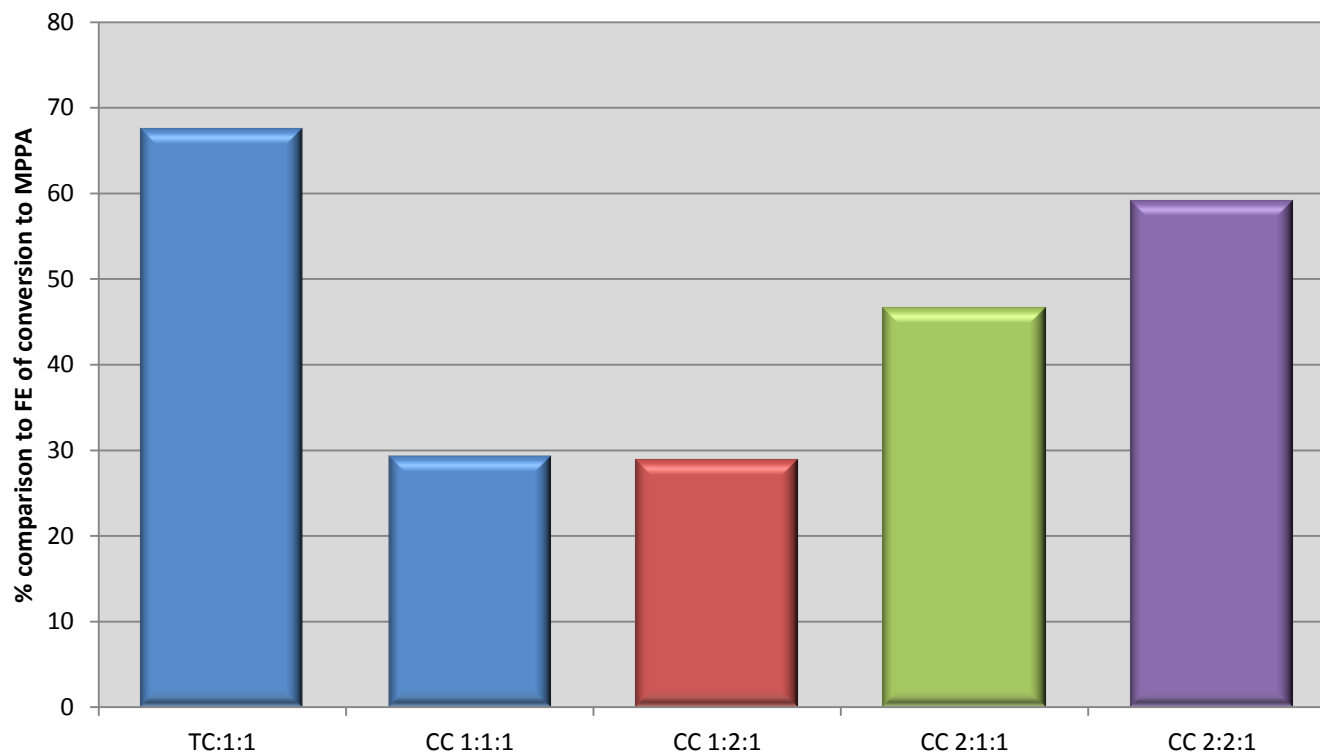

Different TAM : LDH : GDH ratios in the triple combi CLEAs

# CLEAs in Reactors

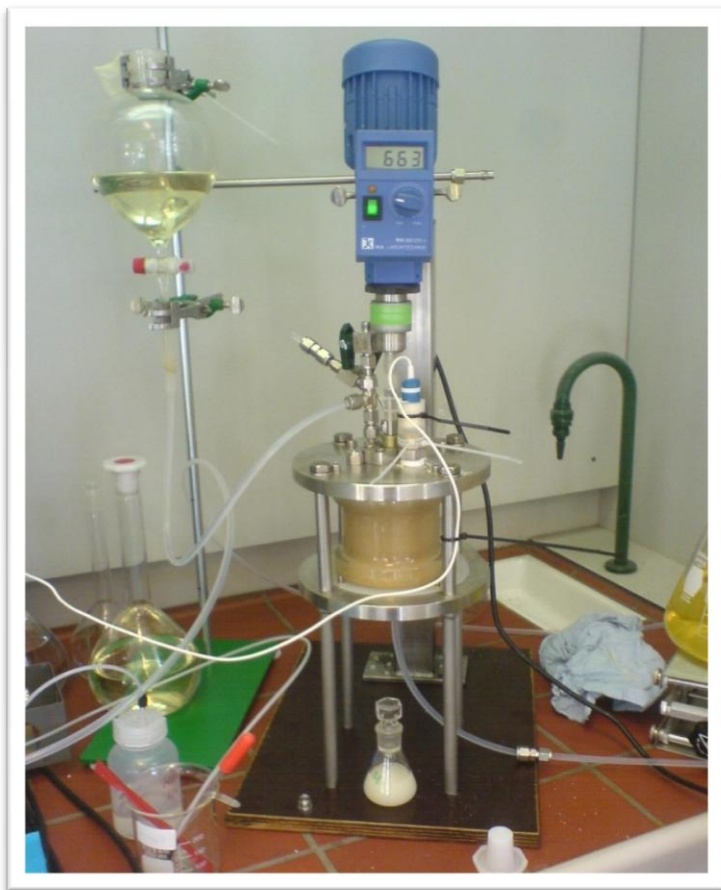

**Pen Acylase in Filter Slurry Reactor (FSR)**

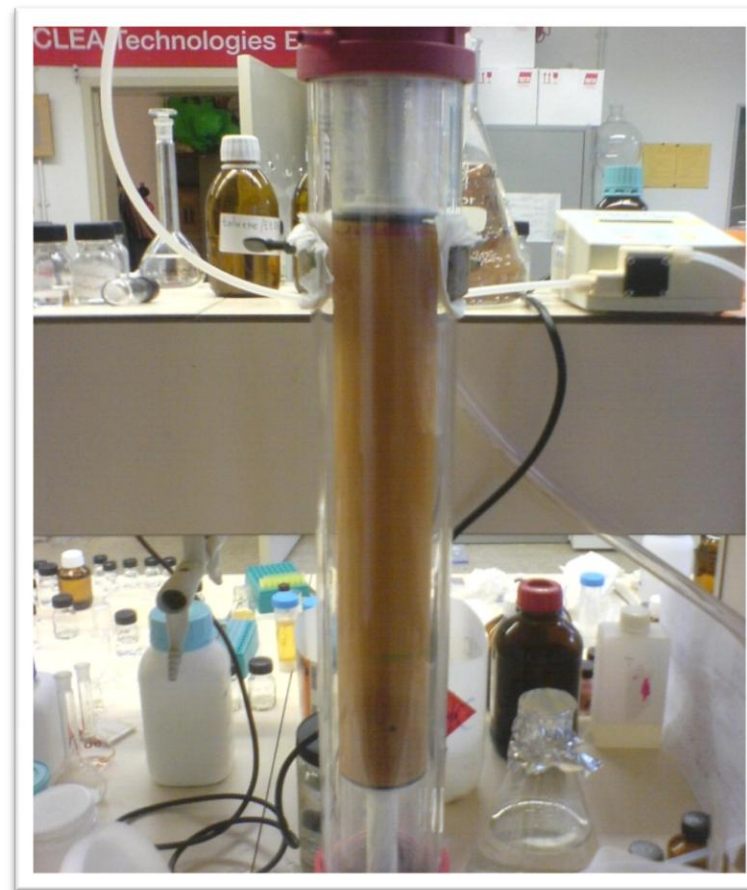

**Alcalase® CLEA in fluidized bed**

M. J. Sorgedrager, D. Verdoes, H. van der Meer, R. A. Sheldon, *ChimicaOggi*, 26 (2008) 23-25

# Microchannel Reactors

- Numbering up vs Scaling up
- $10^2$  x larger surface/volume ratio
- Efficient mass & heat transfer
- Rapid screening of enzyme scope
- $\gamma$ -Lactamase CLEAs in microchannel reactor
  - 100% Activity retention

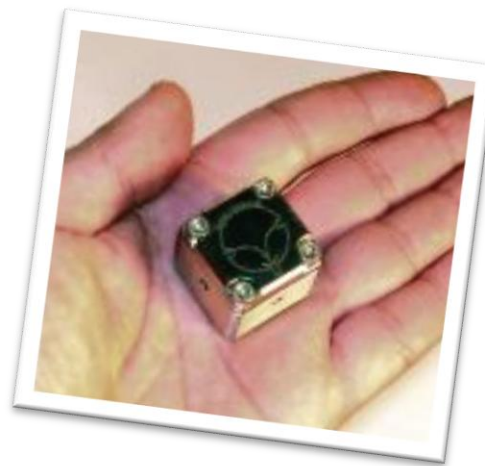

A. M. Hickey, B. Ngamsom, C. Wiles, G. M. Greenway, P. Watts and J. A. Littlechild,  
*Biotechnol. J.*, 4(4) (2009) 510-516

# Conclusions

- Biocatalysis is Green & Sustainable
- Immobilization is a Key Enabling Technology
- The **CLEA Technology** has many Benefits
  - Simple, broadly applicable & cost-effective
  - Improved stability & operational performance
  - High productivity & product quality
  - Applicable to crude cell lysates
  - No leaching of the enzyme in aqueous media
  - Combi-CLEAs for biocatalytic cascades
  - Smart CLEAs (e.g. magnetic CLEAs)

# Thank you.....

[www.cleatechnologies.com](http://www.cleatechnologies.com)

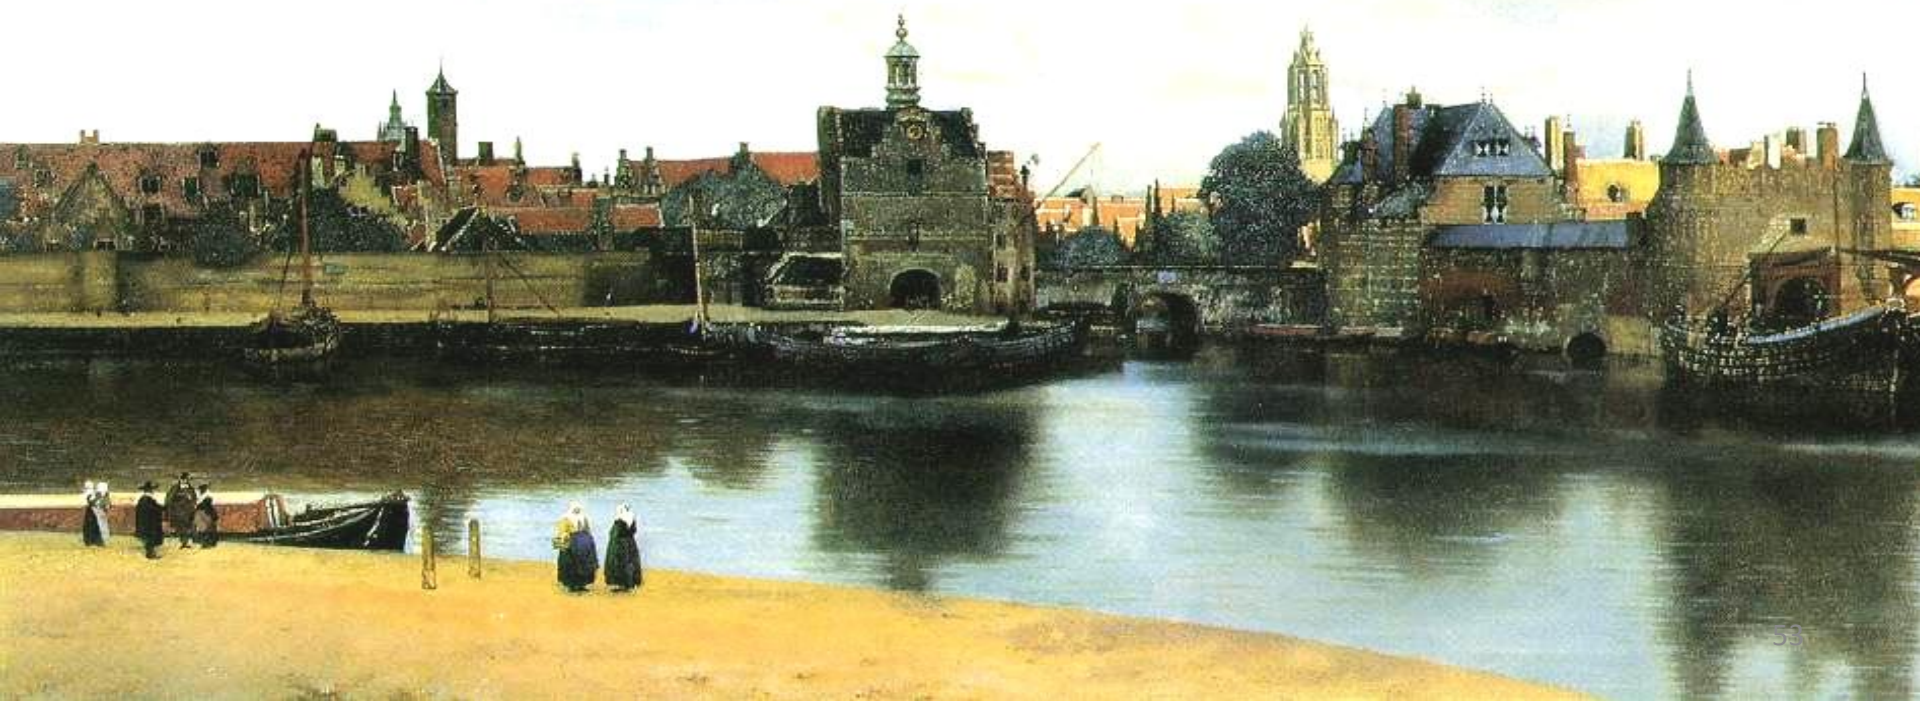

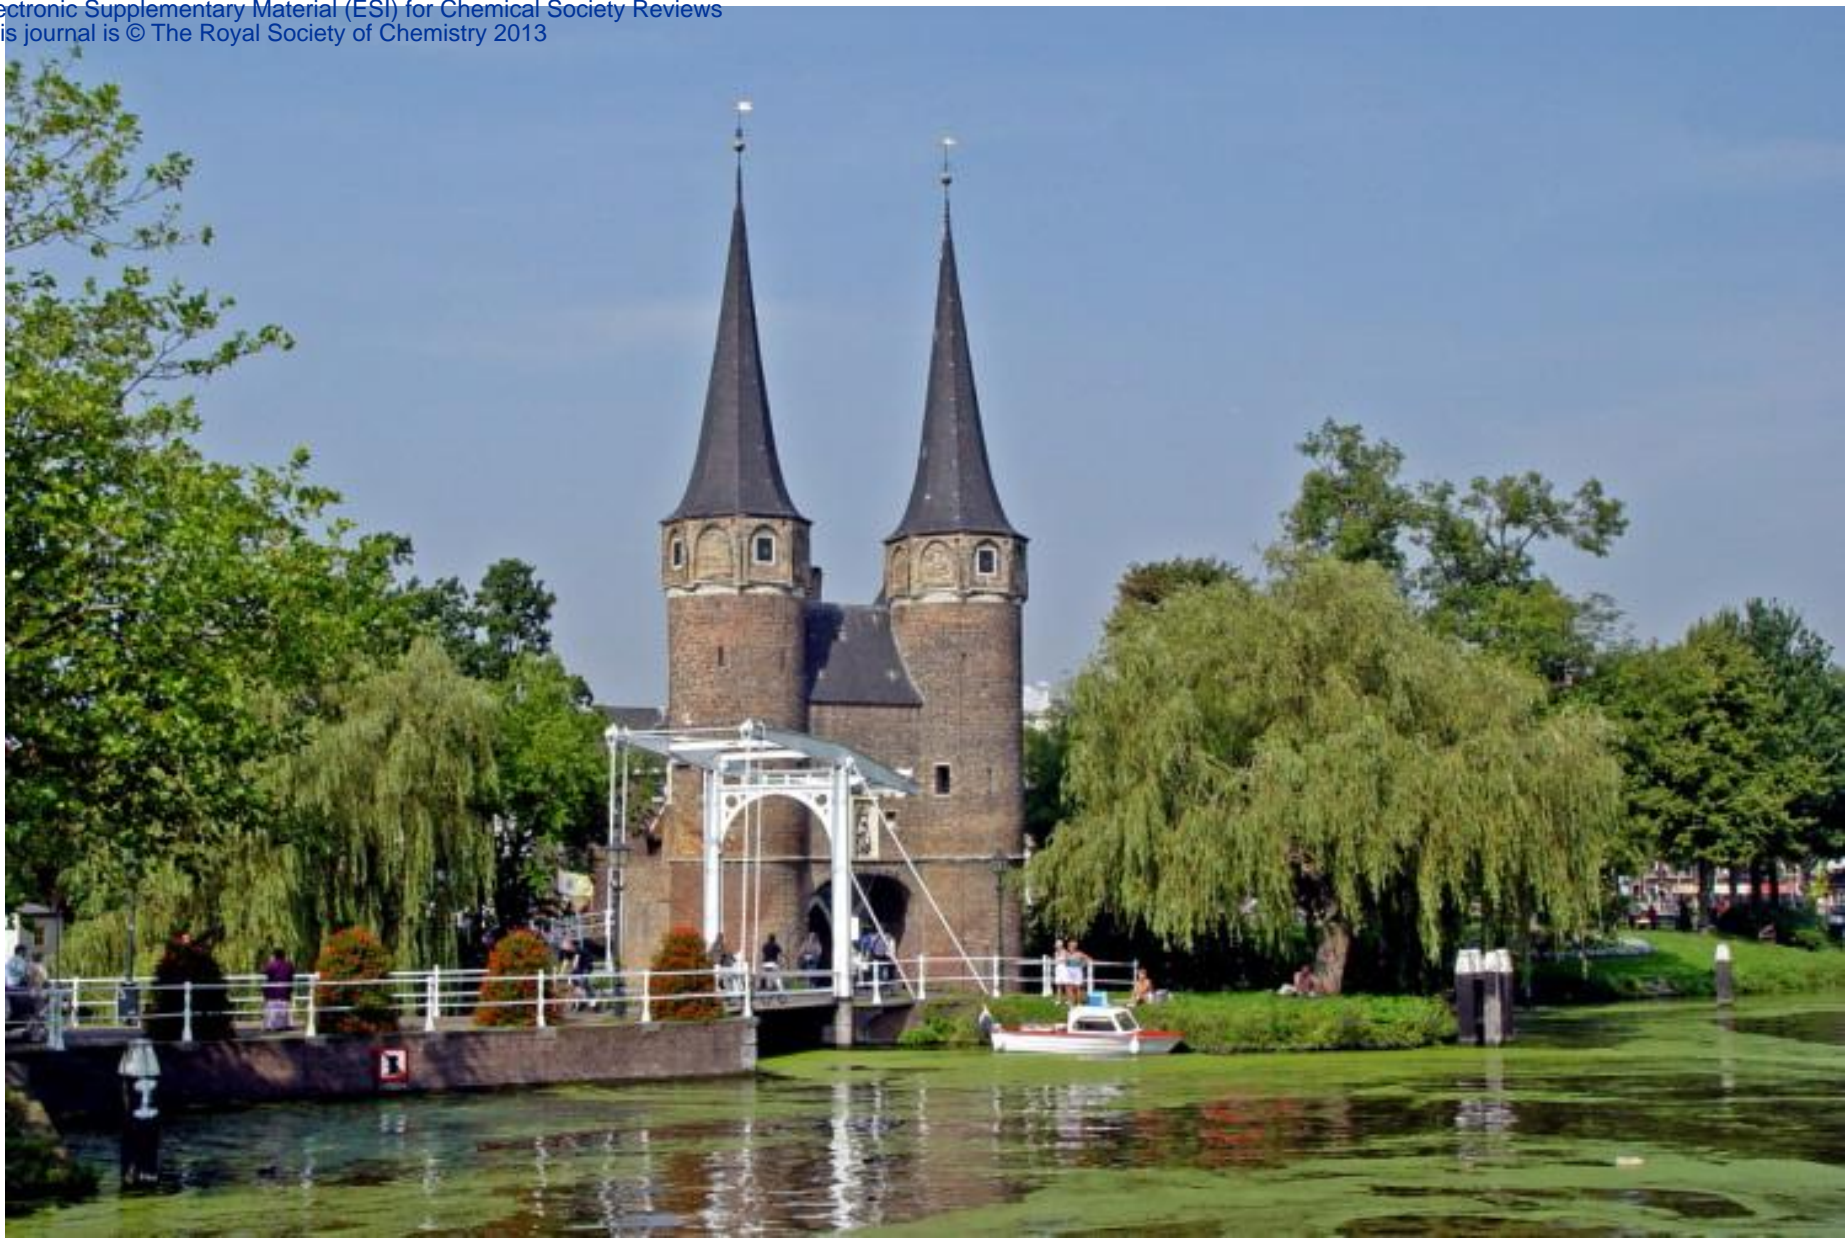

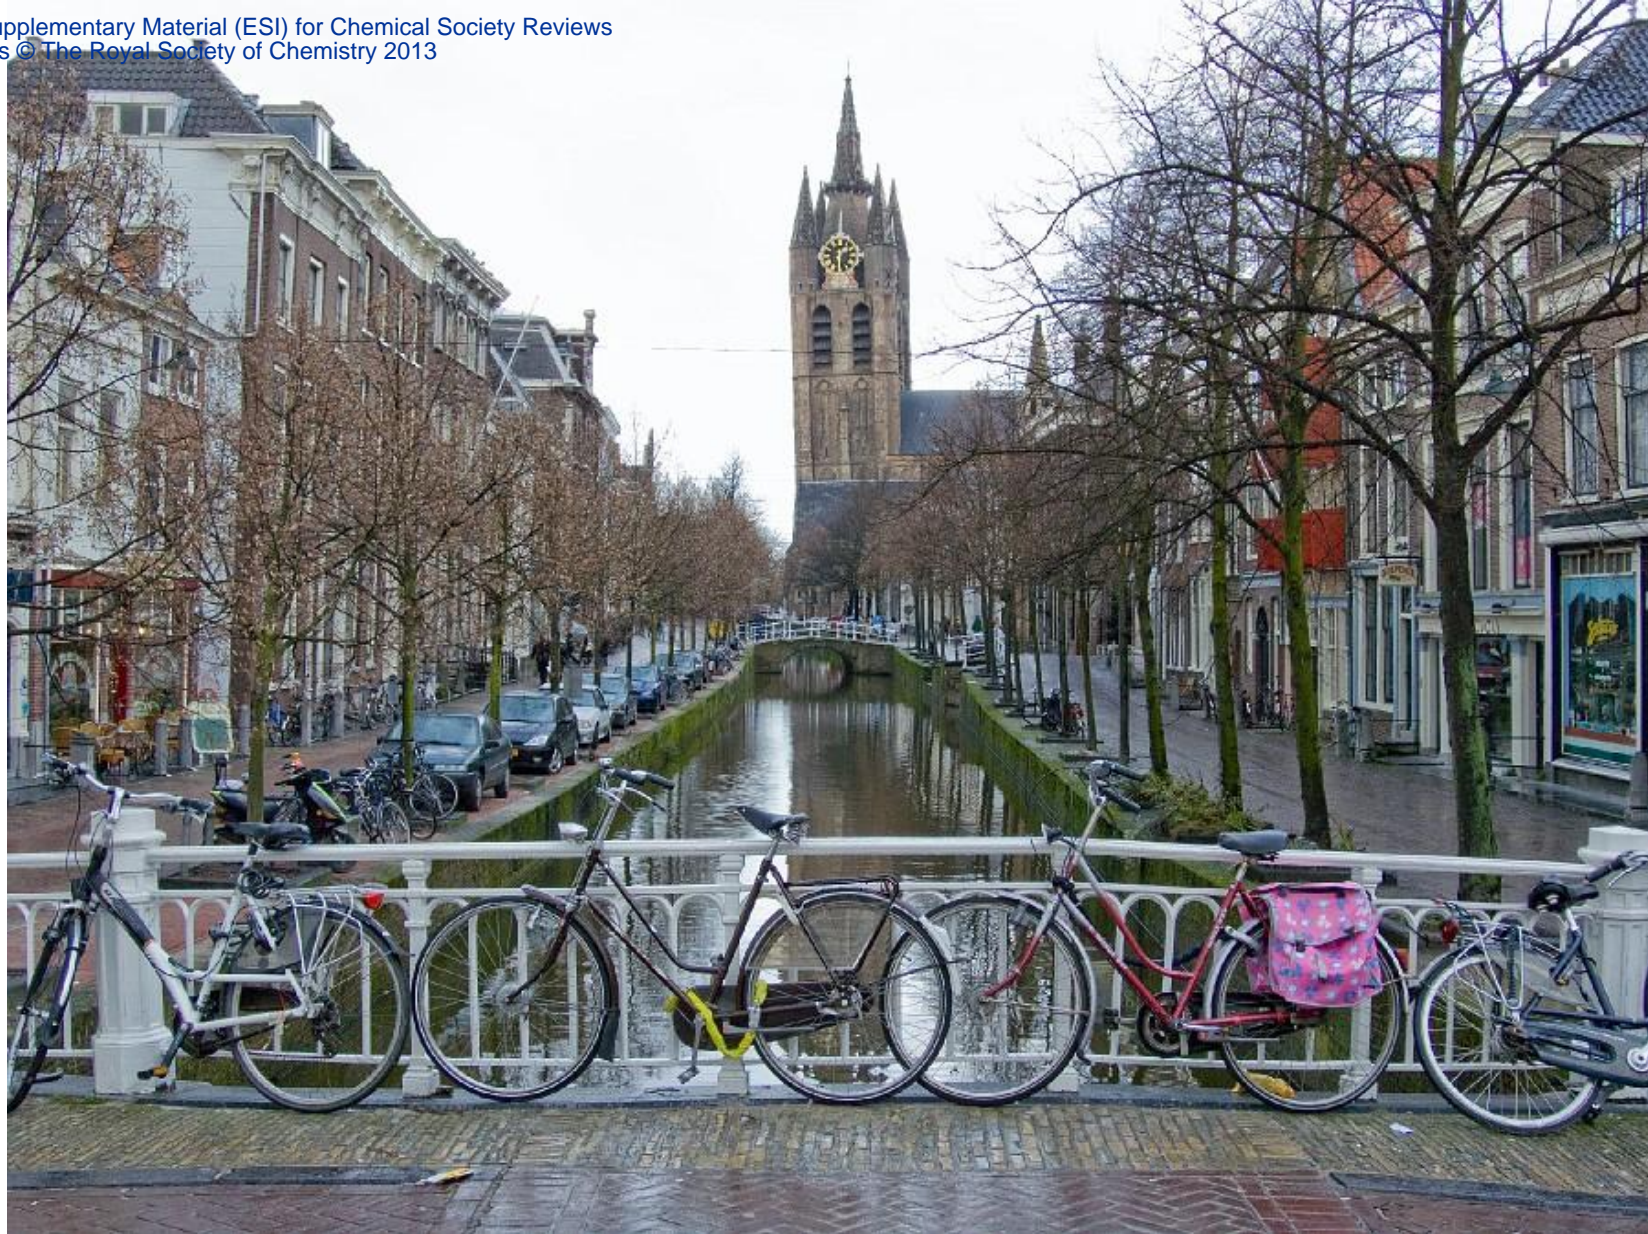

Supplement: c3cs60075k.pdf [file c3cs60075k.pdf]
